# Supplementary material
Source: publisher figshare collection journal article supplement (https://acs.figshare.com/ndownloader/files/6407349)
Supplement: Supplementary file 1 [file 6407349]

## Supporting Information for

# Hydrogen Addition to (pincer)Ir<sup>I</sup>(CO) Complexes: The Importance of Steric and Electronic Factors

Jonathan M. Goldberg, Sophia D. T. Cherry, Louise M. Guard, Werner Kaminsky, Karen I. Goldberg,\* D. Michael Heinekey\*

Department of Chemistry, University of Washington, Seattle, Washington 98195-1700, United States

### *Table of Contents*

#### *S2 General Considerations*

#### *S2 Synthesis and Characterization of Compounds*

#### *S15 Experimental Procedures*

#### *S28 pK<sub>a</sub> Determination of [<sup>(tBu)</sup>4(POCOP)Ir(CO)(H)]<sup>+</sup>*

#### *S30 Hydrogen Pressurization System*

#### *S39 X-ray Crystallography*

#### *S43 References*

## General Considerations

All experiments and manipulations were performed using standard Schlenk techniques under an argon atmosphere or in an argon or nitrogen filled glove box. Glassware and diatomaceous earth were dried in an oven maintained at 140 °C for at least 24 h. Deuterated solvents were dried over calcium hydride or molecular sieves (CD<sub>2</sub>Cl<sub>2</sub>, THF-*d*<sub>8</sub>, and C<sub>6</sub>D<sub>6</sub>) or sodium/benzophenone (toluene-*d*<sub>8</sub>) and vacuum transferred prior to use. Protio solvents were passed through columns of activated alumina and molecular sieves. All other reagents were used as received. <sup>1</sup>H NMR spectra were referenced to residual protio solvents: dichloromethane (5.32 ppm), THF (1.79 ppm), toluene (2.09 ppm), and benzene (7.16 ppm). <sup>13</sup>C NMR shifts were referenced to solvent signals: benzene (128.06 ppm), dichloromethane (54.00 ppm) and THF (26.19 ppm). <sup>31</sup>P NMR shifts were referenced to an 85% H<sub>3</sub>PO<sub>4</sub> external standard (0 ppm). Infrared spectra were recorded on a Bruker Tensor 27 FTIR instrument. NMR spectra were recorded on either a Bruker AV-700, AV-500, DRX-500, or AV-300 NMR instrument. X-ray data was collected at -173°C on a Bruker APEX II single crystal X-ray diffractometer, Mo-radiation. Elemental analysis was performed under air-free conditions at the CENTC facility at the University of Rochester or Atlantic Microlabs. Anhydrous *p*-toluenesulfonic acid was prepared by heating the monohydrate under vacuum at 50°C. <sup>(tBu)<sup>4</sup>(POCOP)Ir(CO)</sup> and <sup>(tBu)<sup>4</sup>(POCOP)Ir(H)<sub>2</sub></sup>,<sup>1</sup> <sup>(iPr)<sup>4</sup>(POCOP)Ir(CO)(H)(Cl)</sup>,<sup>2</sup> and [Hlut]X and [Hpyr]X (for X = BF<sub>4</sub> or BArF<sub>20</sub>)<sup>3</sup> were synthesized according to published procedures.

## Synthesis and Characterization of Compounds

*Improved Synthesis of <sup>(tBu)<sup>4</sup>(POCOP)Ir(CO)(H)]BArF<sub>20</sub> (3-BArF<sub>20</sub>)</sup>*. In air, HCl/Et<sub>2</sub>O (0.6 mL of 2.0 M solution) was added to a solution of <sup>(tBu)<sup>4</sup>(POCOP)Ir(CO)</sup> (**1**) (32.3 mg, 0.0523 mmol) in C<sub>6</sub>H<sub>6</sub> giving a colorless solution. Upon lyophilization, a white solid was obtained. In a nitrogen-filled glovebox, the white solid was combined with KBArF<sub>20</sub> (36 mg, 0.050 mmol) and dissolved in CH<sub>2</sub>Cl<sub>2</sub> (5 mL) resulting in an orange solution and formation of a white precipitate. After sitting at room temperature for 8 h, the solution was filtered through a pad of diatomaceous earth and concentrated to 1 mL. The solution was layered with pentane (9 mL) and stored at -30 °C, yielding orange crystals. The mother liquor was removed and the orange solid was washed with pentane (3 mL). The solid was dried under vacuum giving a pale orange powder; yield: 52 mg (0.040 mmol, 80%). <sup>1</sup>H NMR (CD<sub>2</sub>Cl<sub>2</sub>, 300.10 MHz, 25 °C): δ 7.37 (t, <sup>3</sup>J<sub>HH</sub> = 8.1 Hz, 1H; Ar-*H*), 6.95 (d, <sup>3</sup>J<sub>HH</sub> = 8.1 Hz, 2H; Ar-*H*), 1.37 (m, 36H; P-C(CH<sub>3</sub>)<sub>3</sub>), -35.76 (t, <sup>2</sup>J<sub>PH</sub> = 10.4 Hz, 1H; Ir-*H*). <sup>31</sup>P{<sup>1</sup>H} NMR (CD<sub>2</sub>Cl<sub>2</sub>, 121.51 MHz, 22 °C): δ 191.8 (s).

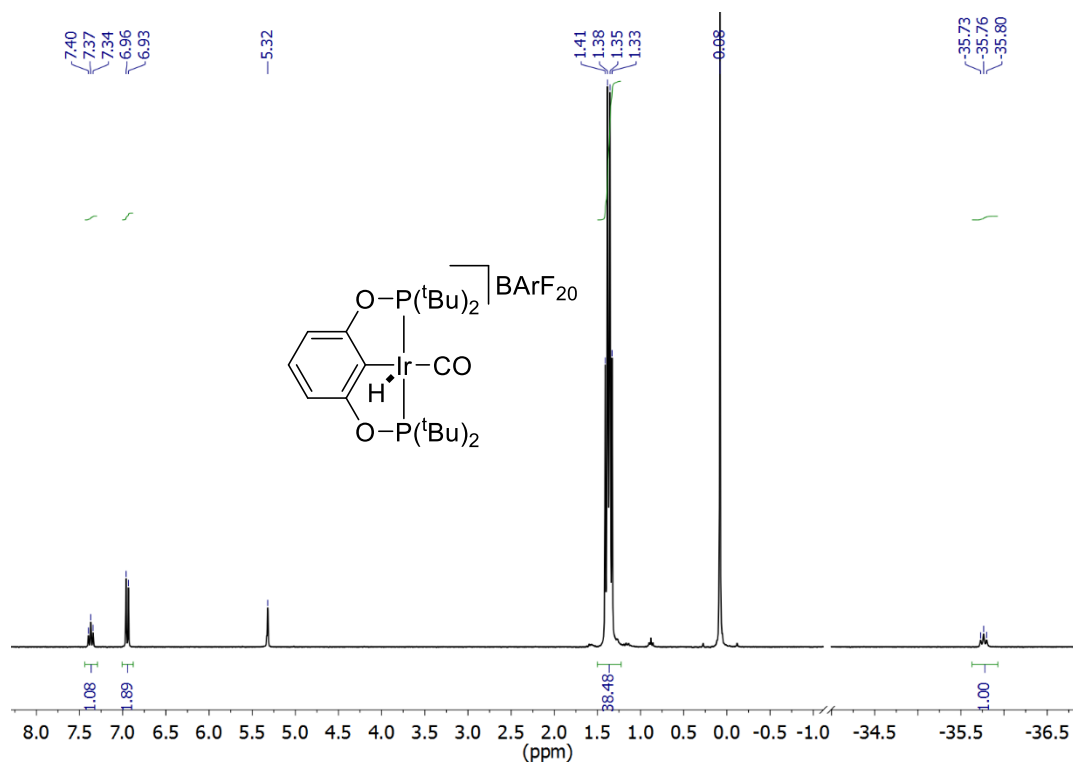

Figure S1.  $^1\text{H}$  NMR spectrum of  $[(t\text{Bu})^4(\text{POCOP})\text{Ir}(\text{CO})(\text{H})]\text{BARF}_{20}$  (**3-BARF<sub>20</sub>**) in  $\text{CD}_2\text{Cl}_2$ .

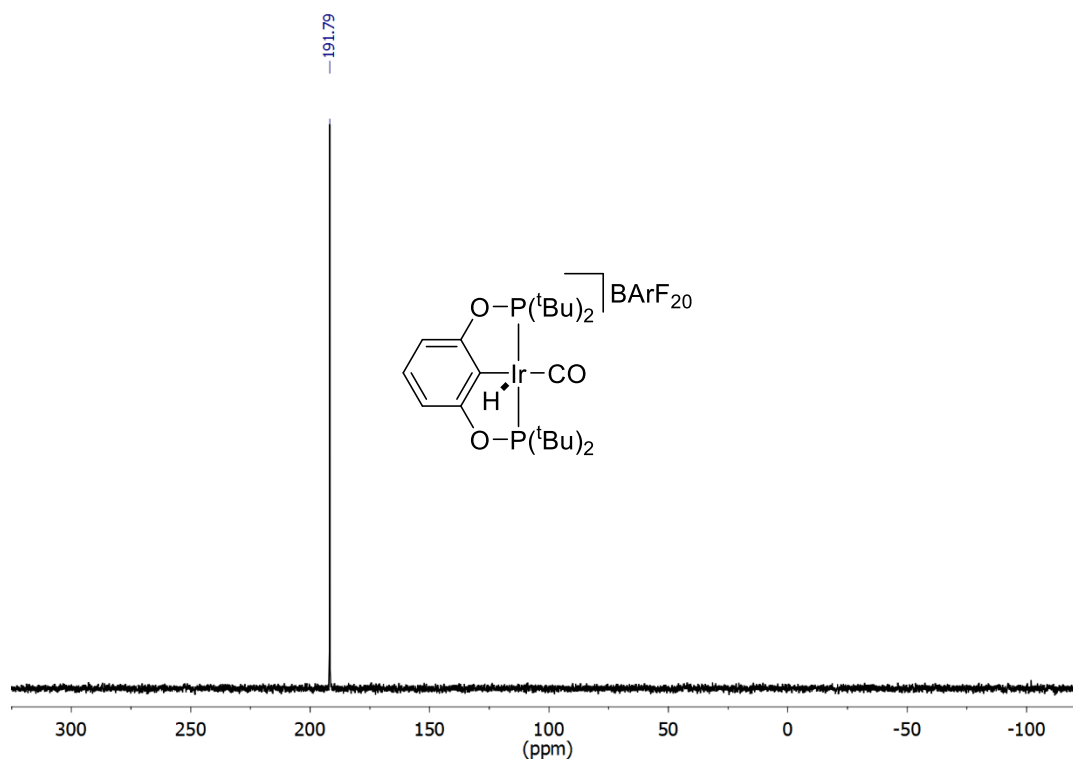

Figure S2.  $^{31}\text{P}\{^1\text{H}\}$  NMR spectrum of  $[(t\text{Bu})^4(\text{POCOP})\text{Ir}(\text{CO})(\text{H})]\text{BARF}_{20}$  (**3-BARF<sub>20</sub>**) in  $\text{CD}_2\text{Cl}_2$ .

*Synthesis of trans-<sup>(iPr)</sup>4(POCOP)Ir(CO)(H)<sub>2</sub> (trans-5).* Under an argon atmosphere, NaBH<sub>4</sub> (308 mg, 8.14 mmol) and <sup>(iPr)</sup>4(POCOP)Ir(CO)(H)(Cl) (**6**) (96.3 mg, 0.161 mmol) were added to a 100 mL flask sealed with a Teflon stopcock. To the mixture was added degassed CH<sub>3</sub>CN (20 mL) followed by degassed ethanol (15 mL). The resulting yellow solution was stirred overnight at room temperature and turned colorless. Solvent was removed under vacuum giving a white residue. The product was extracted with C<sub>6</sub>H<sub>6</sub> (10 mL) and filtered through a pad of diatomaceous earth. Upon lyophilization, **trans-5** was isolated as an air-stable white powder; yield: 68 mg (0.12 mmol, 75%). No further purification was necessary. Crystals suitable for diffraction were grown by slow evaporation of a dichloromethane solution. Anal. Calcd. for C<sub>19</sub>H<sub>33</sub>IrO<sub>3</sub>P<sub>2</sub>: C, 40.49; H, 5.90. Found: C, 40.07; H, 6.03. <sup>1</sup>H NMR (C<sub>6</sub>D<sub>6</sub>, 300.10 MHz, 25 °C): δ 6.80 (t, <sup>3</sup>J<sub>HH</sub> = 7.7 Hz, 1H; Ar-*H*), 6.68 (d, <sup>3</sup>J<sub>HH</sub> = 7.7 Hz, 2H; Ar-*H*), 1.95 (m, 4H; P-CH(CH<sub>3</sub>)<sub>2</sub>), 1.15-0.98 (m, 24H; P-CH(CH<sub>3</sub>)<sub>2</sub>), -10.02 (t, <sup>2</sup>J<sub>PH</sub> = 16.5 Hz, 2H; Ir-*H*). <sup>31</sup>P{<sup>1</sup>H} NMR (C<sub>6</sub>D<sub>6</sub>, 121.49 MHz, 25 °C): δ 173.2 (s). <sup>13</sup>C{<sup>1</sup>H} NMR (C<sub>6</sub>D<sub>6</sub>, 125.67 MHz, 25 °C): δ 177.42 (m; Ir-CO), 163.62 (m; C<sub>Ar</sub>), 125.33 (s; C<sub>Ar</sub>), 121.34 (m; C<sub>Ar</sub>), 104.91 (m; C<sub>Ar</sub>), 32.55 (vt, <sup>1</sup>J<sub>PC</sub> + <sup>3</sup>J<sub>PC</sub> = 36.7 Hz; P-CH(CH<sub>3</sub>)<sub>2</sub>), 17.88 (s; P-CH(CH<sub>3</sub>)<sub>2</sub>), 17.36 (s; P-CH(CH<sub>3</sub>)<sub>2</sub>). IR (solution, CH<sub>2</sub>Cl<sub>2</sub>, cm<sup>-1</sup>): ν(CO) 2008, ν(H-Ir-H) 1757. IR (solution, C<sub>6</sub>D<sub>6</sub>, cm<sup>-1</sup>): ν(CO) 2003, ν(H-Ir-H) 1762.

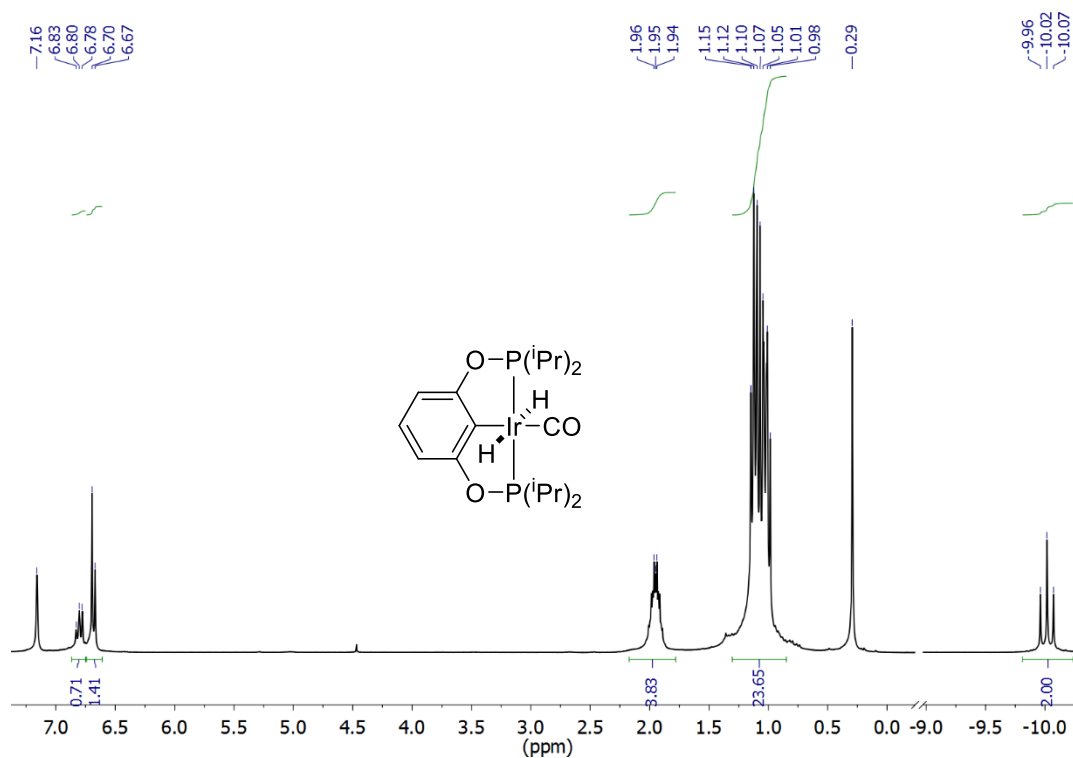

Figure S3. <sup>1</sup>H NMR spectrum of *trans*-<sup>(iPr)</sup>4(POCOP)Ir(CO)(H)<sub>2</sub> (**trans-5**) in C<sub>6</sub>D<sub>6</sub>.

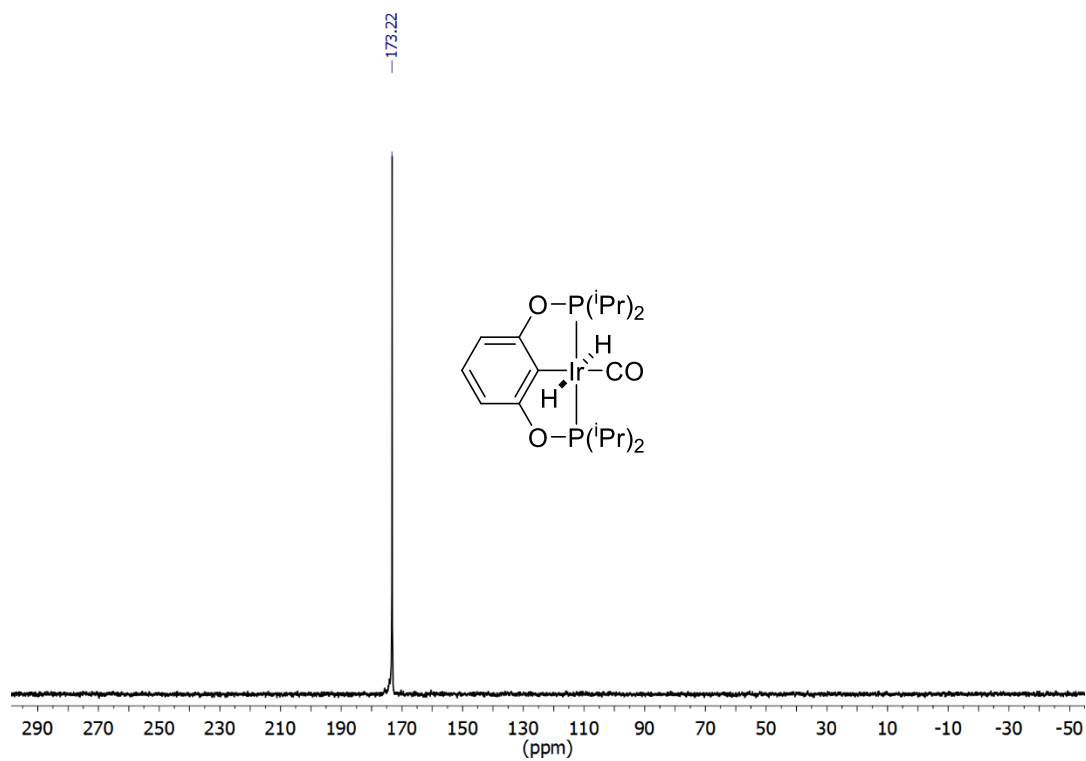

Figure S4.  $^{31}\text{P}\{^1\text{H}\}$  NMR spectrum of *trans*- $(i\text{Pr})_4(\text{POCOP})\text{Ir}(\text{CO})(\text{H})_2$  (*trans*-**5**) in  $\text{C}_6\text{D}_6$ .

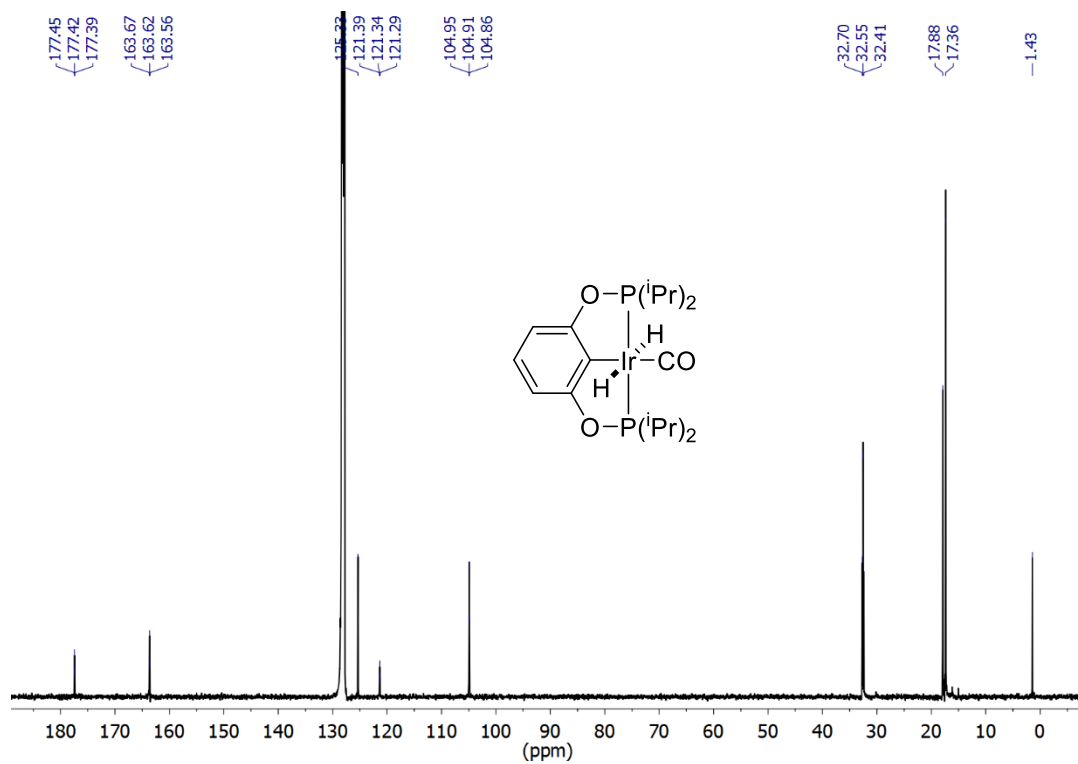

Figure S5.  $^{13}\text{C}\{^1\text{H}\}$  NMR spectrum of *trans*- $(i\text{Pr})_4(\text{POCOP})\text{Ir}(\text{CO})(\text{H})_2$  (*trans*-**5**) in  $\text{C}_6\text{D}_6$ .

**Formation of *cis*-(*i*Pr)<sup>4</sup>(POCOP)Ir(CO)(H)<sub>2</sub> (*cis*-5).** In a nitrogen-filled glovebox, (*i*Pr)<sup>4</sup>(POCOP)Ir(CO) (**4**) (10 mg, 0.018 mmol) was dissolved in freshly distilled C<sub>6</sub>D<sub>6</sub> (0.1 mL) giving a dark yellow solution and was added to a 5 mm thick-walled NMR tube fitted with a Teflon valve. The tube was freeze-pump-thawed three times. The reaction was pressurized with 8 atm H<sub>2</sub> and rotated for 20 min to ensure complete mixing, resulting in a lighter yellow solution. By <sup>31</sup>P NMR spectroscopy, 90% conversion to *cis*-5 was observed. After rotating for 16 h at room temperature, no change in the conversion to *cis*-5 was observed by <sup>31</sup>P NMR spectroscopy. <sup>1</sup>H NMR (C<sub>6</sub>D<sub>6</sub>, 300.13 MHz, 22 °C): δ 6.95-6.80 (m, 3H; Ar-*H*), 2.22 (m, 2H; P-CH(CH<sub>3</sub>)<sub>2</sub>), 1.92 (m, 2H; P-CH(CH<sub>3</sub>)<sub>2</sub>), 1.18-1.06 (m, 12H; P-CH(CH<sub>3</sub>)<sub>2</sub>), 1.01-0.92 (m, 12H; P-CH(CH<sub>3</sub>)<sub>2</sub>), -10.30 (t, <sup>2</sup>*J*<sub>PH</sub> = 9.3 Hz, 1H; Ir-*H*), -11.16 (t, <sup>2</sup>*J*<sub>PH</sub> = 18.4 Hz, 1H; Ir-*H*). <sup>31</sup>P{<sup>1</sup>H} NMR (C<sub>6</sub>D<sub>6</sub>, 121.51 Hz, 22 °C): δ 167.7 (s).

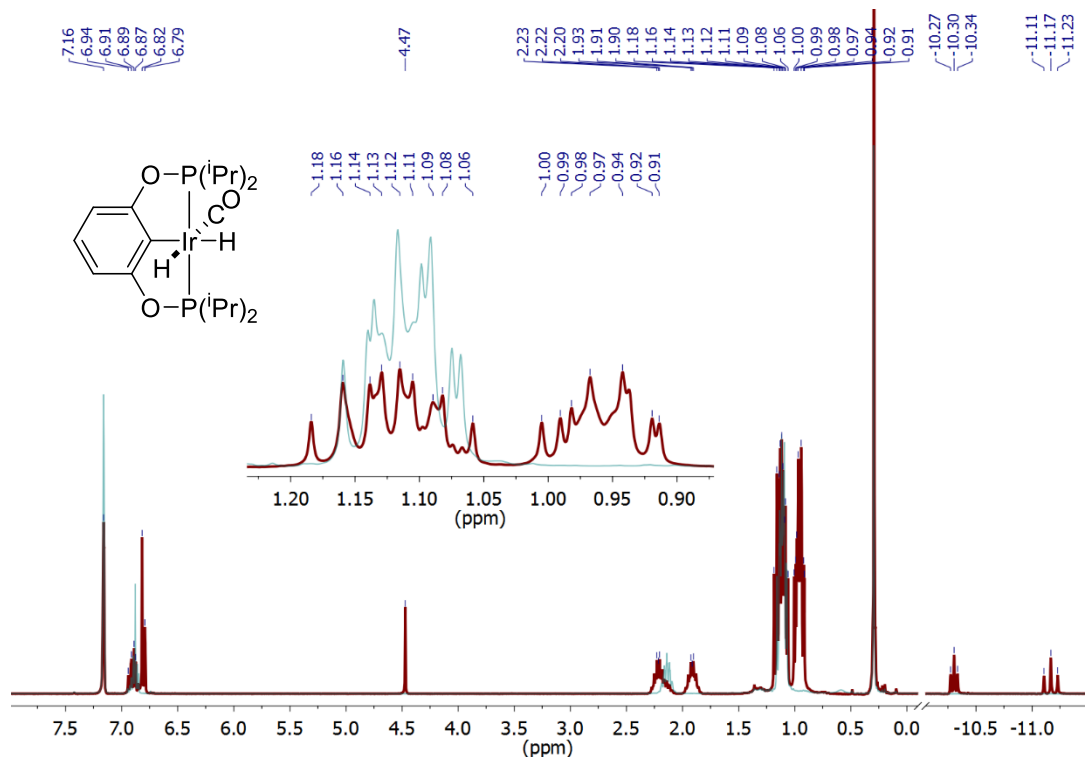

Figure S6. <sup>1</sup>H NMR spectrum of *cis*-(*i*Pr)<sup>4</sup>(POCOP)Ir(CO)(H)<sub>2</sub> (*cis*-5) in C<sub>6</sub>D<sub>6</sub>. Note thicker line shows the *cis*-dihydride complex and the thinner overlay shows (*i*Pr)<sup>4</sup>(POCOP)Ir(CO) (**4**) reference spectrum.

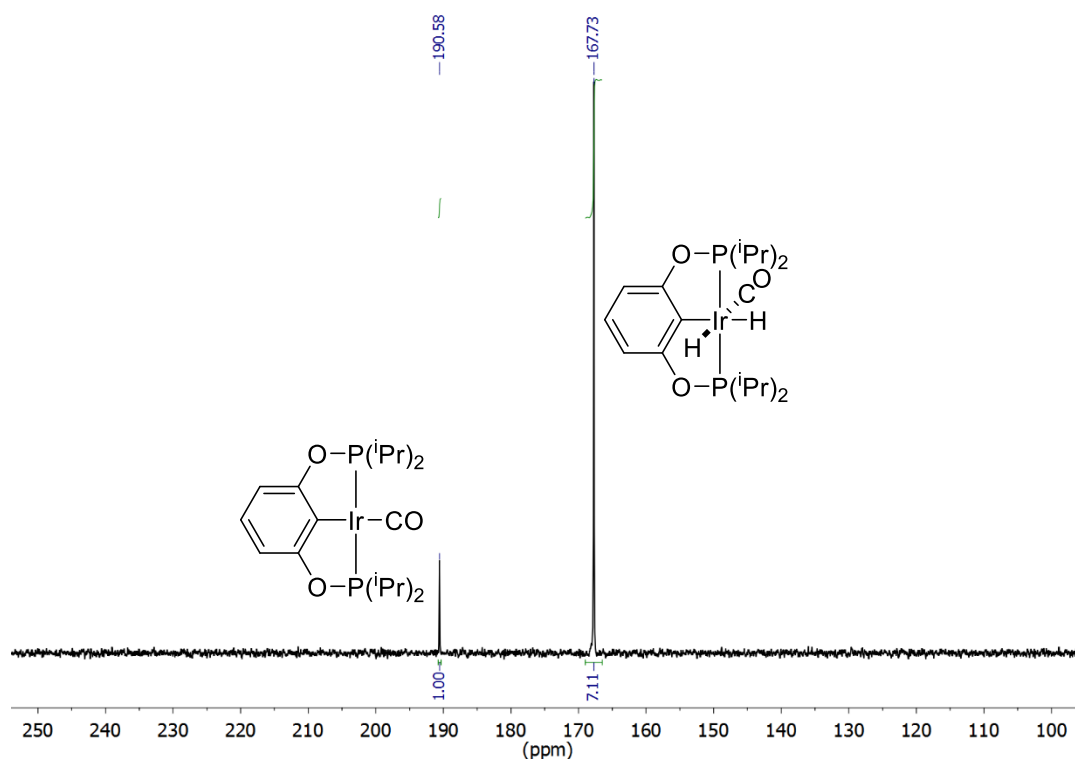

Figure S7.  $^{31}\text{P}\{^1\text{H}\}$  NMR spectrum of *cis*-(*i*Pr) $_4$ (POCOP)Ir(CO)(H) $_2$  (*cis*-5) in  $\text{C}_6\text{D}_6$ . Note residual (*i*Pr) $_4$ (POCOP)Ir(CO) (4) is observed at 190.6 ppm.

**Synthesis of [*i*Pr] $_4$ (POCOP)Ir(CO)(H)(pyr)]BF $_4$  (7-BF $_4$ ).** In a nitrogen filled glovebox, [Hpyr]BF $_4$  (24.6 mg, 0.147 mmol) was added to a 20 mL vial containing (*i*Pr) $_4$ (POCOP)Ir(CO) (4) (85 mg, 0.15 mmol). THF (5 mL) and  $\text{CH}_2\text{Cl}_2$  (2 mL) were added giving a golden yellow solution with undissolved [Hpyr]BF $_4$ . Upon sitting at room temperature for 5 days, the solution color faded to pale yellow and all [Hpyr]BF $_4$  dissolved. The solution was filtered through a pad of diatomaceous earth and the solvent was removed under vacuum. The yellow/white residue was triturated with pentane then washed with  $\text{C}_6\text{H}_6$  (3 mL) to remove trace (*i*Pr) $_4$ (POCOP)Ir(CO) (4). The white solid was dried under vacuum then dissolved in  $\text{CH}_2\text{Cl}_2$  (1 mL) and filtered through diatomaceous earth. Pentane (7 mL) was layered over the  $\text{CH}_2\text{Cl}_2$  solution and the sample was stored at  $-30\text{ }^\circ\text{C}$  for 5 days giving large colorless plate crystals suitable for diffraction; yield: 68 mg (0.093 mmol, 63%). Anal. Calcd. for  $\text{C}_{24}\text{H}_{37}\text{BF}_4\text{IrNO}_3\text{P}_2$ : C, 39.57; H, 5.12; N, 1.92. Found: C, 39.74; H, 5.12; N, 2.01.  $^1\text{H}$  NMR ( $\text{CD}_2\text{Cl}_2$ , 300.10 MHz,  $13\text{ }^\circ\text{C}$ ):  $\delta$  8.90 (br s;  $\text{C}_5\text{H}_5\text{N}$ ), 8.04 (t,  $^3J_{\text{HH}} = 7.6\text{ Hz}$ , 1H; *para*- $\text{C}_5\text{H}_5\text{N}$ ), 7.46 (br s;  $\text{C}_5\text{H}_5\text{N}$ ), 7.18 (t,  $^3J_{\text{HH}} = 8.0\text{ Hz}$ , 1H; Ar-H), 6.76 (d,  $^3J_{\text{HH}} = 8.0\text{ Hz}$ , 2H; Ar-H), 2.58 (m, 2H; P-CH( $\text{CH}_3$ ) $_2$ ), 1.95 (m, 2H; P-CH( $\text{CH}_3$ ) $_2$ ), 1.24-1.14 (m, 12H; P-CH( $\text{CH}_3$ ) $_2$ ), 1.06-0.93 (m, 12H; P-CH( $\text{CH}_3$ ) $_2$ ), -19.46 (t,  $^2J_{\text{PH}} = 13.5\text{ Hz}$ , 1H; Ir-H).  $^{31}\text{P}\{^1\text{H}\}$  NMR ( $\text{CD}_2\text{Cl}_2$ , 121.49 MHz,  $13\text{ }^\circ\text{C}$ ):  $\delta$  164.7 (s).  $^{13}\text{C}\{^1\text{H}\}$  NMR ( $\text{CD}_2\text{Cl}_2$ , 75.47 MHz,  $25\text{ }^\circ\text{C}$ ):  $\delta$  177.53 (m; Ir-CO), 164.03 (m;  $\text{C}_{\text{Ar}}$ ), 140.93 (s;  $\text{C}_{\text{Ar}}$ ), 130.74 (s;  $\text{C}_{\text{Ar}}$ ), 128.47 (m;  $\text{C}_{\text{Ar}}$ ), 107.49 (m;  $\text{C}_{\text{Ar}}$ ), 31.34 (vt,  $^1J_{\text{PC}} + ^3J_{\text{PC}} = 33.0\text{ Hz}$ ; P-CH( $\text{CH}_3$ ) $_2$ ), 30.23 (vt,  $^1J_{\text{PC}} + ^3J_{\text{PC}} = 36.1\text{ Hz}$ ; P-CH( $\text{CH}_3$ ) $_2$ ), 18.54 (m; P-CH( $\text{CH}_3$ ) $_2$ ), 17.78 (m; P-CH( $\text{CH}_3$ ) $_2$ ), 17.61 (m; P-CH( $\text{CH}_3$ ) $_2$ ), 16.06 (m; P-CH( $\text{CH}_3$ ) $_2$ ). IR (solution,  $\text{CH}_2\text{Cl}_2$ ,  $\text{cm}^{-1}$ ):  $\nu(\text{CO})$  2042.

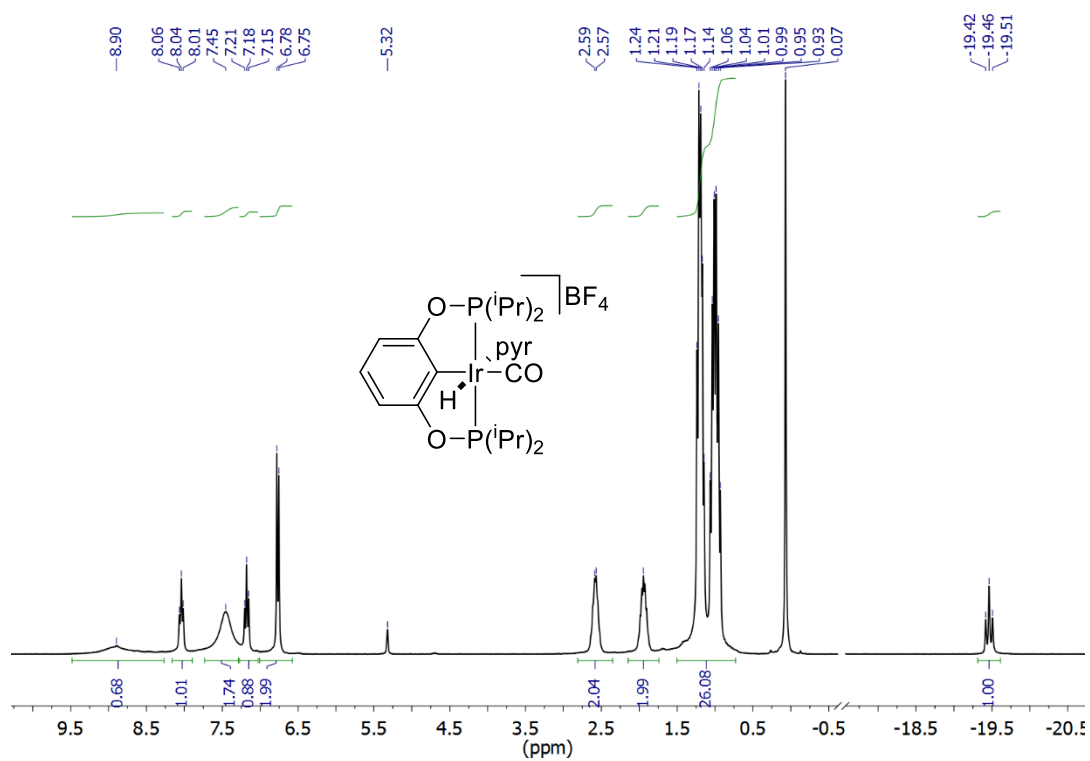

Figure S8. <sup>1</sup>H NMR spectrum of  $[(iPr)_4(POCOP)Ir(CO)(H)(pyr)]BF_4$  (**7-BF<sub>4</sub>**) in CD<sub>2</sub>Cl<sub>2</sub>.

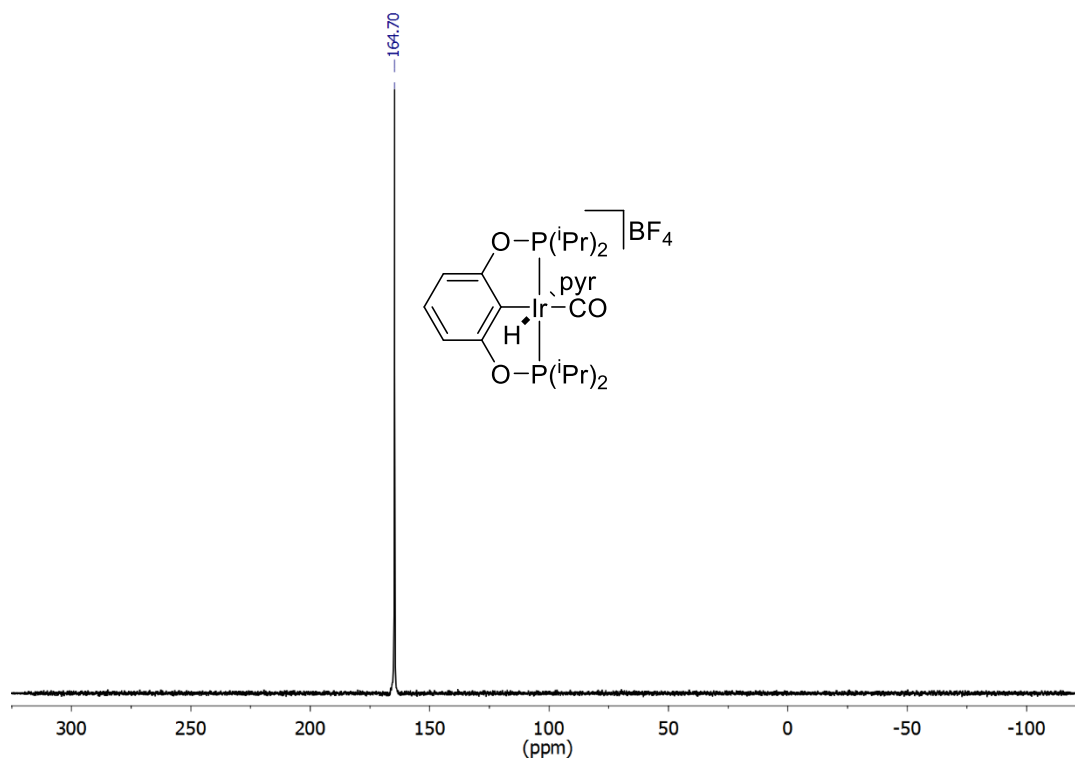

Figure S9. <sup>31</sup>P{<sup>1</sup>H} NMR spectrum of  $[(iPr)_4(POCOP)Ir(CO)(H)(pyr)]BF_4$  (**7-BF<sub>4</sub>**) in CD<sub>2</sub>Cl<sub>2</sub>.

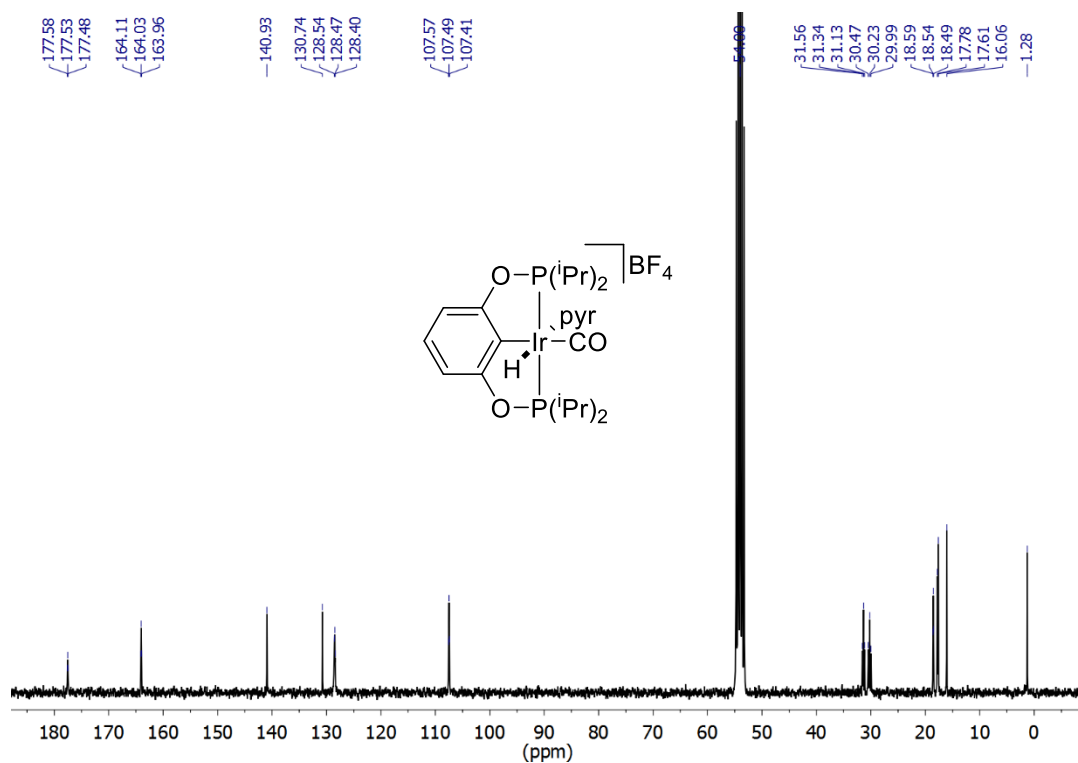

Figure S10.  $^{13}\text{C}\{^1\text{H}\}$  NMR (75.47 MHz) spectrum of  $[\text{iPr}^4(\text{POCOP})\text{Ir}(\text{CO})(\text{H})(\text{pyr})]\text{BF}_4$  (**7-BF<sub>4</sub>**) in  $\text{CD}_2\text{Cl}_2$ .

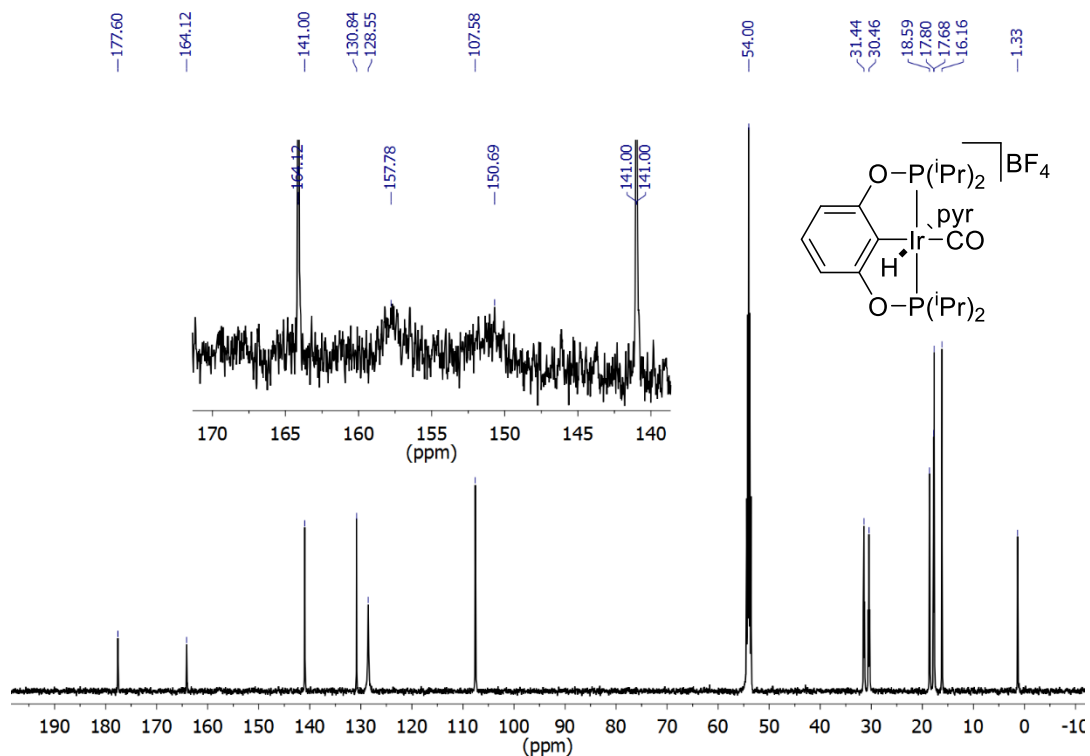

Figure S11.  $^{13}\text{C}\{^1\text{H}\}$  NMR (125.77 MHz) spectrum of  $[\text{iPr}^4(\text{POCOP})\text{Ir}(\text{CO})(\text{H})(\text{pyr})]\text{BF}_4$  (**7-BF<sub>4</sub>**) in  $\text{CD}_2\text{Cl}_2$ . Inset shows broadened resonances assigned to iridium-bound pyridine.

*Preparation of  $[(tBu)^4(POCOP)Ir(CO)(H)(pyr)]BArF_{20}$  (**8**).* An NMR tube fitted with a J. Young style Teflon valve was charged with  $(tBu)^4(POCOP)Ir(CO)$  (**1**) (10 mg, 0.017 mmol),  $[Hpyr]BArF_{20}$  (13 mg, 0.017 mmol), and  $CD_2Cl_2$  (0.5 mL) giving a yellow solution.  $^1H$  NMR ( $CD_2Cl_2$ , 300.13 MHz, 24 °C):  $\delta$  8.98 (m, 1H;  $C_5H_5N$ ), 7.87 (m, 1H;  $C_5H_5N$ ), 7.46-7.38 (m, 2H;  $C_5H_5N$ ), 7.25-7.19 (m, 2H; overlapping  $C_5H_5N$  and Ar-H), 6.84 (m, 2H; Ar-H), 1.33 (vt,  $^3J_{PH} + ^5J_{PH} = 15.4$  Hz, 18H; P-C( $CH_3$ )<sub>3</sub>), 1.02 (vt,  $^3J_{PH} + ^5J_{PH} = 15.7$  Hz, 18H; P-C( $CH_3$ )<sub>3</sub>), -19.42 (t,  $^2J_{PH} = 14.7$  Hz, 1H; Ir-H).  $^{31}P\{^1H\}$  NMR ( $CD_2Cl_2$ , 121.51 MHz, 24 °C):  $\delta$  170.0 (s).

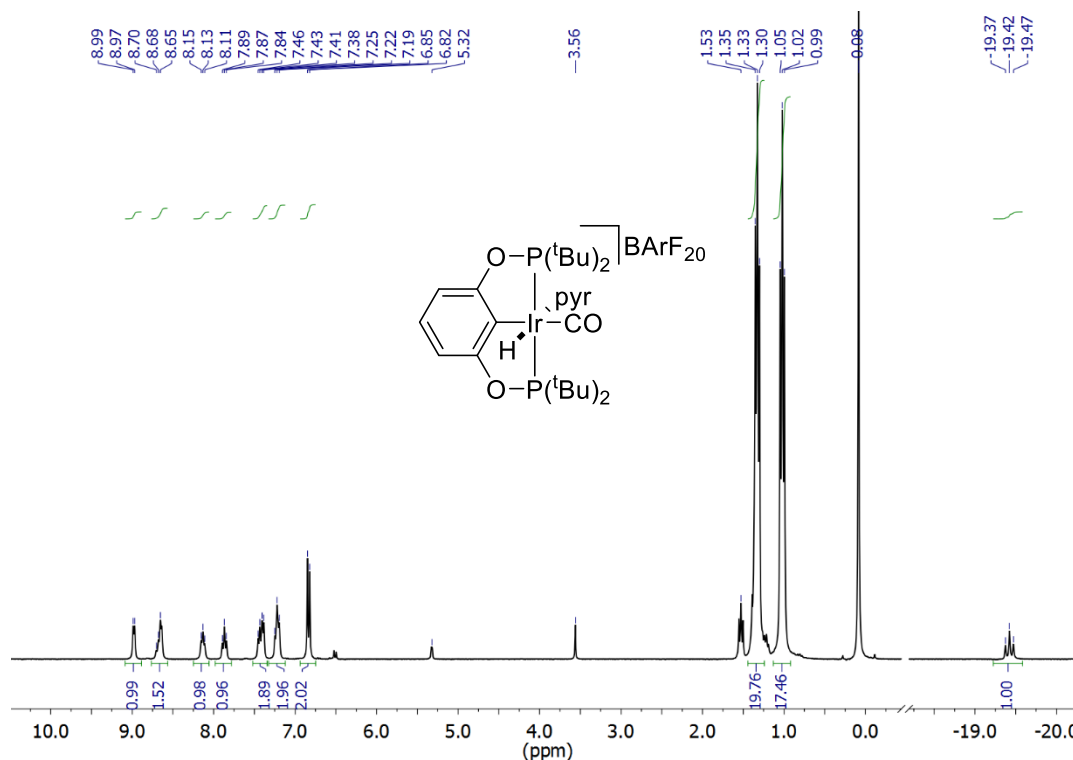

Figure S12.  $^1H$  NMR spectrum of  $[(tBu)^4(POCOP)Ir(CO)(H)(pyr)]BArF_{20}$  (**8**) in  $CD_2Cl_2$ . Note methanol (3.56 ppm) and *cis*- $(tBu)^4(POCOP)Ir(CO)(H)(Cl)$  (1.53 ppm) are impurities.

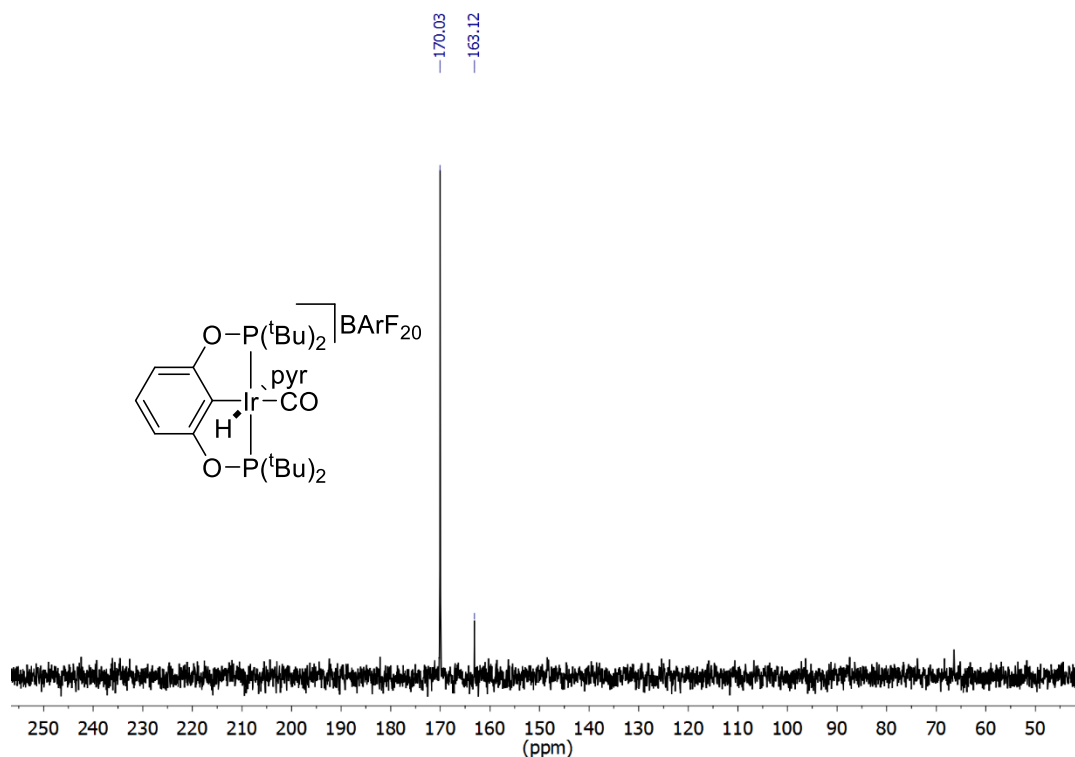

Figure S13.  $^{31}\text{P}\{^1\text{H}\}$  NMR spectrum of  $[(\text{tBu})_4(\text{POCOP})\text{Ir}(\text{CO})(\text{H})(\text{pyr})]\text{BArF}_{20}$  (**8**) in  $\text{CD}_2\text{Cl}_2$ . Note *cis*- $(\text{tBu})_4(\text{POCOP})\text{Ir}(\text{CO})(\text{H})(\text{Cl})$  (163.1 ppm) is an impurity.

*Preparation of  $(i\text{Pr})_4(\text{POCOP})\text{Ir}(\text{CO})(\text{H})(\text{OTs})$  (**9**).* In an argon filled glovebox,  $(i\text{Pr})_4(\text{POCOP})\text{Ir}(\text{CO})$  (**4**) (10 mg, 0.018 mmol) and anhydrous *p*-toluenesulfonic acid (16 mg, 0.093 mmol) were added to an NMR tube fitted with a J. Young style Teflon valve.  $\text{CD}_2\text{Cl}_2$  (0.5 mL) was vacuum transferred into the tube giving a colorless solution.  $^1\text{H}$  NMR ( $\text{CD}_2\text{Cl}_2$ , 300.10 MHz, 25 °C):  $\delta$  7.02 (t,  $^3J_{\text{HH}} = 8.1$  Hz, 1H; Ar-*H*), 6.62 (d,  $^3J_{\text{HH}} = 8.1$  Hz, 2H; Ar-*H*), 2.72 (m, 2H; P-*CH*( $\text{CH}_3$ )<sub>2</sub>), 2.53 (m, 2H; P-*CH*( $\text{CH}_3$ )<sub>2</sub>), 1.32-1.23 (m, 12H; P-*CH*( $\text{CH}_3$ )<sub>2</sub>), 1.12 (m, 6H; P-*CH*( $\text{CH}_3$ )<sub>2</sub>), 0.92 (m, 6H; P-*CH*( $\text{CH}_3$ )<sub>2</sub>), -25.17 (t,  $^2J_{\text{PH}} = 13.6$  Hz, 1H; Ir-*H*). The peaks assignable to bound *p*-toluenesulfonate could not be distinguished from excess *p*TsOH in solution.  $^{31}\text{P}\{^1\text{H}\}$  NMR ( $\text{CD}_2\text{Cl}_2$ , 121.49 MHz, 25 °C):  $\delta$  170.6 (s).

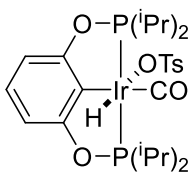[illegible]

S12

*Synthesis of*  $[(tBu)^4(PCP)Ir(CO)(H)(pyr)]BF_4$  (**12**).  $(tBu)^4(PCP)Ir(CO)$  (**10**) (40 mg, 0.065 mmol) was dissolved in  $CH_2Cl_2$  (10 mL) and  $[Hpyr]BF_4$  (11 mg, 0.065 mmol) added. The solution was left to stand for 15 hours, upon which the solution had turned from yellow to colorless. The solution was filtered through diatomaceous earth and the solvent removed to yield a colorless solid; yield: 46 mg (0.060 mmol, 90%). X-ray diffraction quality crystals were grown from a ternary mixture of  $CH_2Cl_2$ , diethyl ether and pentane at  $-30\text{ }^\circ\text{C}$ .  $^1H$  NMR ( $CD_2Cl_2$ , 499.71 MHz):  $\delta$  9.01 (d,  $^3J_{HH} = 5.9$  Hz, 1H;  $C_5H_5N$ ), 7.88 (t,  $^3J_{HH} = 7.4$  Hz, 1H;  $C_5H_5N$ ), 7.59 (d,  $^3J_{HH} = 5.3$  Hz, 1H;  $C_5H_5N$ ), 7.39 (t,  $^3J_{HH} = 6.1$  Hz, 1H;  $C_5H_5N$ ), 7.29 (d,  $^3J_{HH} = 7.6$  Hz, 2H; Ar-H), 7.22 (t,  $^3J_{HH} = 6.5$  Hz, 1H;  $C_5H_5N$ ), 7.16 (t,  $^3J_{HH} = 7.4$  Hz, 1H; Ar-H), 3.57 (dvt,  $^2J_{HH} = 17.1$ ,  $^2J_{PH} + ^4J_{PH} = 3.9$  Hz, 2H; ArCH<sub>2</sub>PR<sub>2</sub>), 3.39 (dvt,  $^2J_{HH} = 17.1$ ,  $^2J_{PH} + ^4J_{PH} = 3.6$  Hz, 2H; ArCH<sub>2</sub>PR<sub>2</sub>), 1.26 (vt,  $^3J_{PH} + ^5J_{PH} = 6.9$  Hz, 18H; PC(CH<sub>3</sub>)<sub>3</sub>), 1.03 (vt,  $^3J_{PH} + ^5J_{PH} = 6.8$  Hz, 18H; PC(CH<sub>3</sub>)<sub>3</sub>), -19.72 (t,  $^2J_{PH} = 14$  Hz, 1H; Ir-H).  $^{13}C\{^1H\}$  NMR ( $CD_2Cl_2$ , 125.77 MHz):  $\delta$  179.59 (m, Ir-CO), 160.15 (s; C<sub>Ar</sub>), 159.93 (m; C<sub>Ar</sub>), 150.69 (s; C<sub>Ar</sub>), 149.50 (m; C<sub>Ar</sub>), 140.02 (s; C<sub>Ar</sub>), 127.87 (s; C<sub>Ar</sub>), 127.85 (s; C<sub>Ar</sub>), 127.41 (s; C<sub>Ar</sub>), 123.49 (s; C<sub>Ar</sub>), 38.30 (m; P-C(CH<sub>3</sub>)<sub>3</sub>), 37.20 (m; ArCH<sub>2</sub>PR<sub>2</sub>), 29.80 (m; P-C(CH<sub>3</sub>)<sub>3</sub>), 29.57 (m; P-C(CH<sub>3</sub>)<sub>3</sub>).  $^{31}P$  NMR ( $CD_2Cl_2$ , 202.31 MHz):  $\delta$  60.8 (s). Anal. Calcd. for C<sub>30</sub>H<sub>49</sub>BF<sub>4</sub>IrNOP<sub>2</sub>: C, 46.15; H, 6.33; N, 1.79. Found: C, 46.15; H, 6.15, N, 1.69. IR (solution,  $CH_2Cl_2$ ,  $cm^{-1}$ ):  $\nu(CO)$  2018.

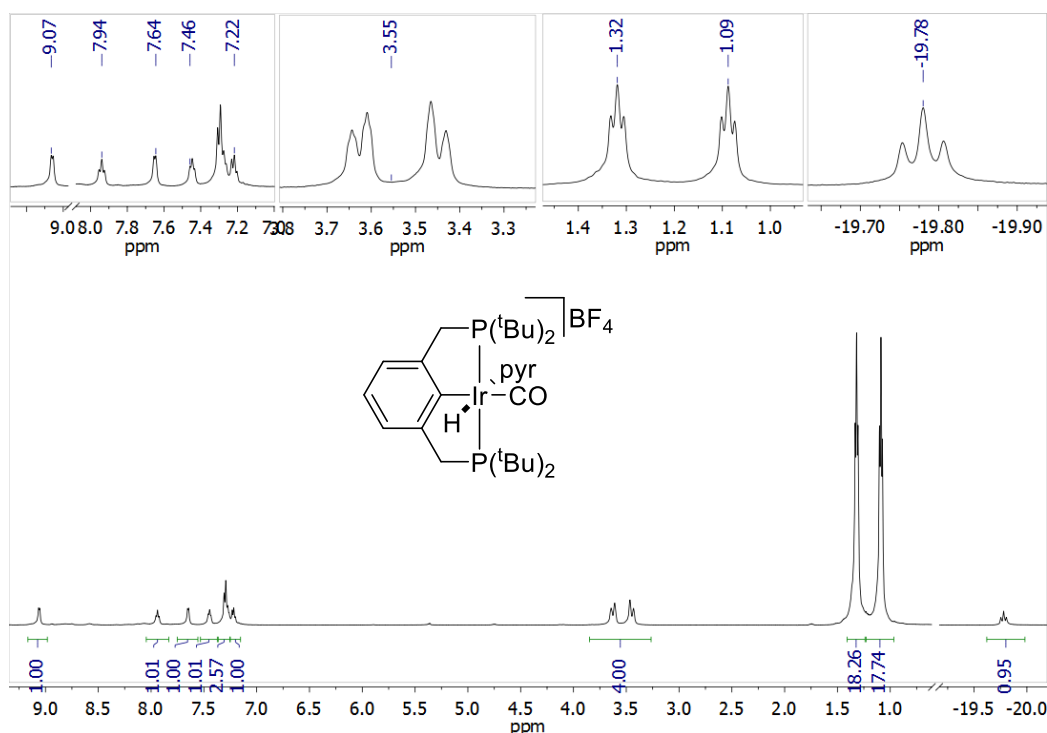

Figure S16.  $^1H$  NMR spectrum of  $[(tBu)^4(PCP)Ir(CO)(H)(pyr)]BF_4$  (**12**) in  $CD_2Cl_2$ .

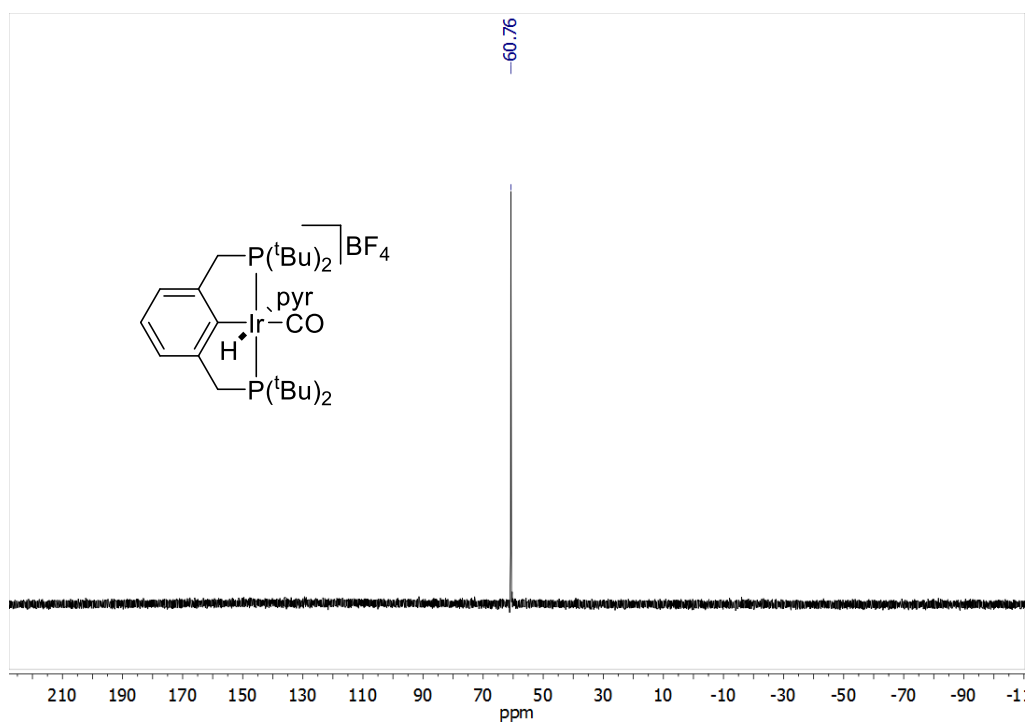

Figure S17.  $^{31}P\{^1H\}$  NMR spectrum of  $[(tBu)_4(PCP)Ir(CO)(H)(pyr)]BF_4$  (**12**) in  $CD_2Cl_2$ .

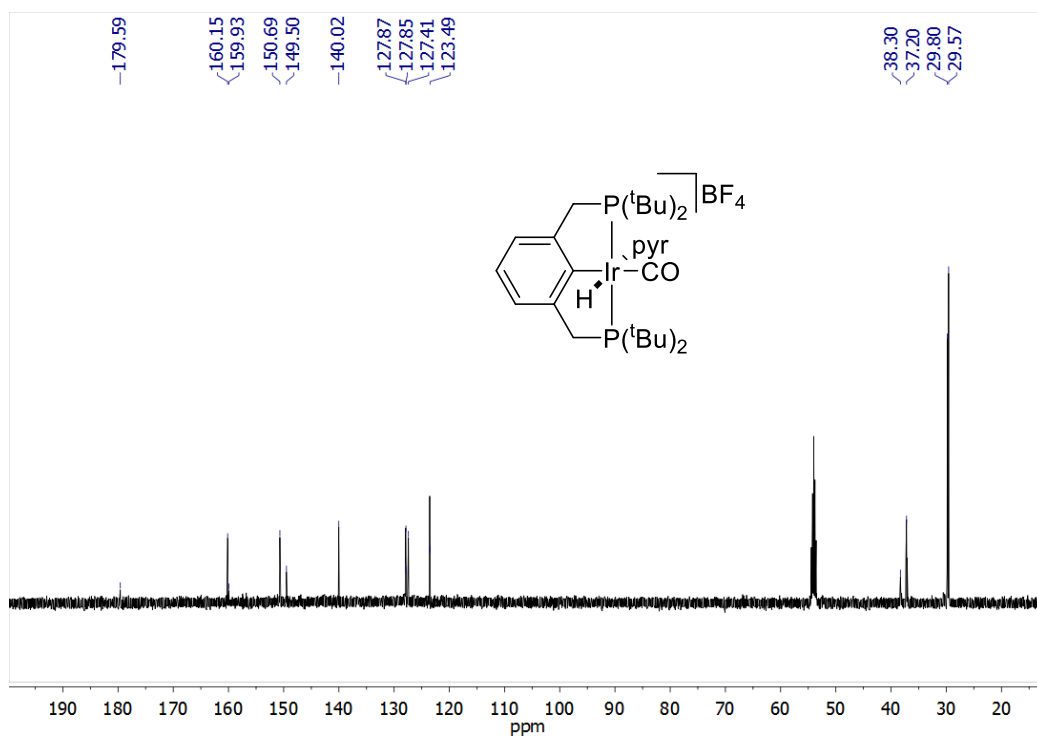

Figure S18.  $^{13}C\{^1H\}$  NMR spectrum of  $[(tBu)_4(PCP)Ir(CO)(H)(pyr)]BF_4$  (**12**) in  $CD_2Cl_2$ .

Recrystallization of **13** from pentane at  $-35^{\circ}\text{C}$  under an  $\text{N}_2$  atmosphere led to the crystallization of  $[(i\text{Pr})^4(\text{PCP})\text{Ir}]_2(\mu\text{-N}_2)$ .

$^1\text{H}$  NMR ( $\text{C}_6\text{D}_6$ , 499.71 MHz):  $\delta$  7.20 (d,  $^3J_{\text{HH}} = 7.3$  Hz, 2H; Ar-*H*), 7.08 (t,  $^3J_{\text{HH}} = 7.3$  Hz, 1H; Ar-*H*), 3.03 (vt,  $^2J_{\text{PH}} + ^4J_{\text{PH}} = 3.3$  Hz, 4H; ArCH<sub>2</sub>PR<sub>2</sub>), 2.14 (m, 4H; PCH(CH<sub>3</sub>)<sub>2</sub>), 1.33 (m, 12H; PCH(CH<sub>3</sub>)<sub>2</sub>), 1.10 (m, 12H; PCH(CH<sub>3</sub>)<sub>2</sub>).  $^{31}\text{P}\{^1\text{H}\}$  NMR ( $\text{C}_6\text{D}_6$ , 202.31 MHz):  $\delta$  59.5 (s). See X-ray crystallography section for ORTEP.

*Synthesis of  $[(i\text{Pr})^4(\text{PCP})\text{Ir}(\text{CO})(\text{H})(\text{pyr})]\text{BF}_4$  (**15**).*  $(i\text{Pr})^4(\text{PCP})\text{Ir}(\text{CO})$  (**13**) (98 mg, 0.18 mmol) was dissolved in  $\text{CH}_2\text{Cl}_2$  (5 mL) and  $[\text{Hpyr}]\text{BF}_4$  (29 mg, 0.18 mmol) added. The solution was left to stand for 48 hours, upon which the solution had turned from orange to yellow. The solution was filtered through diatomaceous earth and the solvent removed to yield a yellow solid which was recrystallized from a ternary mixture of  $\text{CH}_2\text{Cl}_2$ , diethyl ether and pentane at  $-30^{\circ}\text{C}$ ; yield: 115 mg (0.16 mmol, 91 %).  $^1\text{H}$  NMR ( $\text{CD}_2\text{Cl}_2$ , 300.10 MHz):  $\delta$  8.25 (br s, 2H; C<sub>5</sub>H<sub>5</sub>N), 7.98 (t,  $^3J_{\text{HH}} = 8.0$  Hz, 1H; Ar-*H*), 7.39 (t,  $^3J_{\text{HH}} = 6.9$  Hz, 2H; C<sub>5</sub>H<sub>5</sub>N), 7.19 (m, 3H, Ar-*H*), 3.58 (dvt,  $^2J_{\text{HH}} = 17.7$ ,  $^2J_{\text{PH}} + ^4J_{\text{PH}} = 4.6$  Hz, 2H; ArCH<sub>2</sub>PR<sub>2</sub>), 3.34 (dvt,  $^2J_{\text{HH}} = 17.7$ ,  $^2J_{\text{PH}} + ^4J_{\text{PH}} = 4.1$  Hz, 2H; ArCH<sub>2</sub>PR<sub>2</sub>), 2.34 (m, 2H; PCH(CH<sub>3</sub>)<sub>2</sub>), 1.90 (m, 2H; PCH(CH<sub>3</sub>)<sub>2</sub>), 1.07 (m, 24H; PCH(CH<sub>3</sub>)<sub>2</sub>), -19.15 (t,  $^2J_{\text{PH}} = 12$  Hz, 1H; Ir-*H*).  $^{31}\text{P}\{^1\text{H}\}$  NMR ( $\text{CD}_2\text{Cl}_2$ , 121.49 MHz):  $\delta$  47.8 (s). IR (solution,  $\text{CH}_2\text{Cl}_2$ ,  $\text{cm}^{-1}$ ):  $\nu(\text{CO})$  2023.

## Experimental procedures

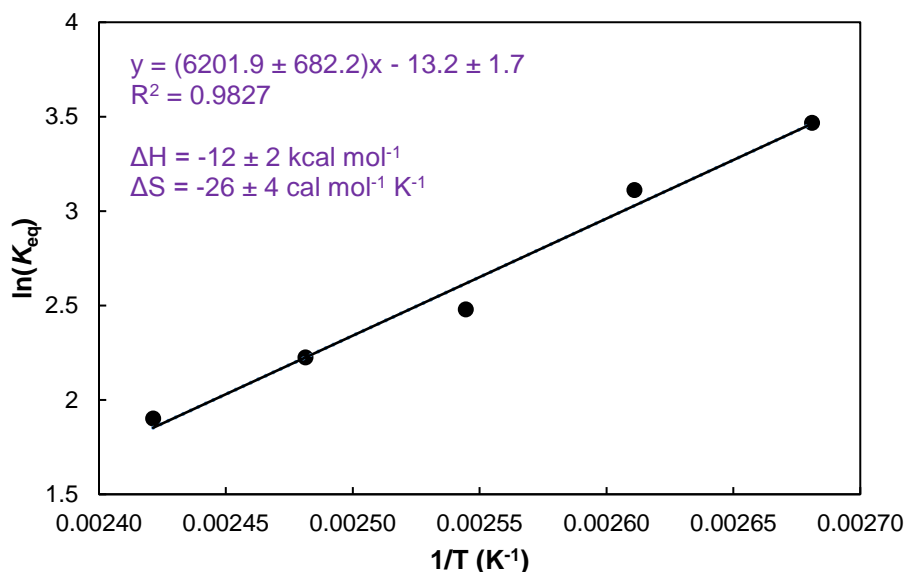

Figure S19. van't Hoff plot for equilibrium between *cis*-**5** and *trans*-**5** in mesitylene.

*Low temperature CO addition to  $(t\text{Bu})^4(\text{POCOP})\text{Ir}(\text{H})_2$  (**16**).* In an argon-filled glovebox,  $(t\text{Bu})^4(\text{POCOP})\text{Ir}(\text{H})_2$  (**16**) (8.5 mg, 0.014 mmol) was added to an NMR tube fitted with a J. Young style Teflon valve. Toluene-*d*<sub>8</sub> (~0.5 mL) was vacuum transferred into the tube, resulting in a red

solution. The sample was freeze-pump-thawed three times. The tube was cooled to -78 °C and pressurized with 1 atm CO followed by immediate cooling to -196 °C. The sample was thawed to -78 °C and immediately inserted into a pre-cooled NMR probe at -63 °C.

Isomerization of *cis*- to *trans*-<sup>(iPr)<sub>4</sub></sup>(POCOP)Ir(CO)(H)<sub>2</sub> (*cis*-**5** to *trans*-**5**). Heating the sample containing ~90% *cis*-**5** for 88 h at 100 °C under 8 atm H<sub>2</sub> in a 5 mm thick-walled NMR tube fitted with a Teflon valve results in 95% conversion to *trans*-**5** by <sup>31</sup>P NMR spectroscopy. The remaining 5% is *cis*-**5**.

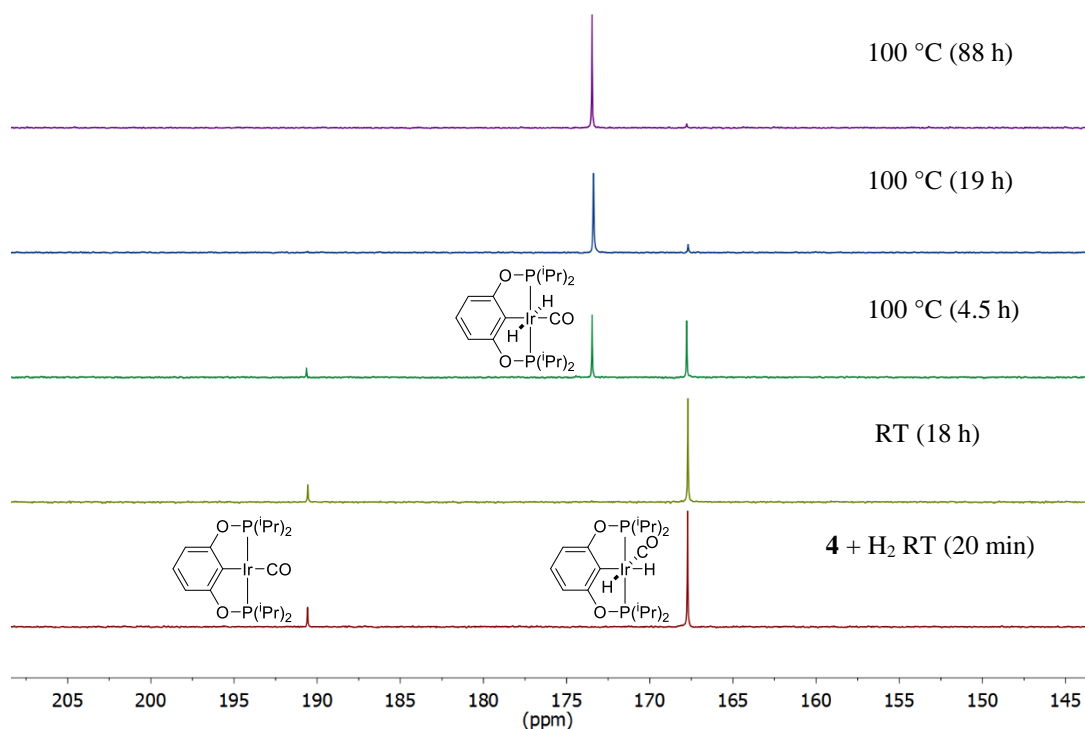

Figure S20. Stacked <sup>31</sup>P{<sup>1</sup>H} NMR spectra of *cis*- to *trans*-<sup>(iPr)<sub>4</sub></sup>(POCOP)Ir(CO)(H)<sub>2</sub> (*cis*-**5** to *trans*-**5**) isomerization.

Reaction of <sup>(tBu)<sub>4</sub></sup>(POCOP)Ir(CO) (**1**) with H<sub>2</sub> (acid catalyzed with [Hpyr]BF<sub>4</sub>). In a nitrogen-filled glovebox, [Hpyr]BF<sub>4</sub> (4 μL, 1.0 M in CH<sub>3</sub>CN, 0.004 mmol) was added to a 5 mm thick-walled NMR tube fitted with a Teflon valve. Solvent was removed under vacuum. A solution of <sup>(tBu)<sub>4</sub></sup>(POCOP)Ir(CO) (**1**) (4 mg, 0.007 mmol) in THF-*d*<sub>8</sub> was added to the tube; some undissolved [Hpyr]BF<sub>4</sub> and **1** was observed. The sample was freeze-pump-thawed three times and pressurized with 8 atm H<sub>2</sub>.

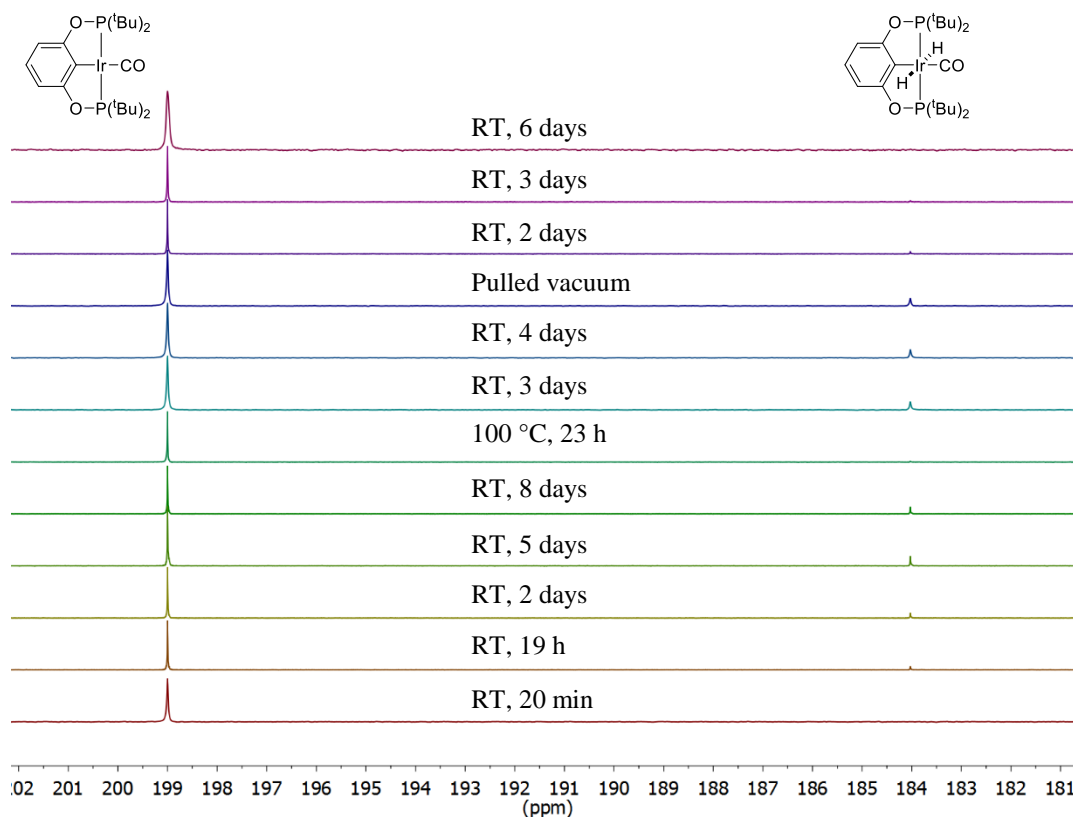

Figure S21. Stacked  $^{31}\text{P}\{^1\text{H}\}$  NMR spectra of proton-catalyzed hydrogen addition to  $(t\text{Bu})_4(\text{POCOP})\text{Ir}(\text{CO})$  (**1**) with  $[\text{Hpyr}]\text{BF}_4$  in  $\text{THF-}d_8$ .

*Reaction of  $(t\text{Bu})_4(\text{POCOP})\text{Ir}(\text{CO})$  (**1**) and  $[(t\text{Bu})_4(\text{POCOP})\text{Ir}(\text{CO})(\text{H})]\text{BF}_4$  (**3-BF<sub>4</sub>**) with  $\text{H}_2$ .* In a nitrogen-filled glovebox,  $[(t\text{Bu})_4(\text{POCOP})\text{Ir}(\text{CO})(\text{H})]\text{BF}_4$  (**3-BF<sub>4</sub>**) (4 mg, 0.006 mmol) and  $(t\text{Bu})_4(\text{POCOP})\text{Ir}(\text{CO})$  (**1**) (5.6 mg, 0.0091 mmol) were dissolved in  $\text{CD}_2\text{Cl}_2$ , giving a yellow solution and transferred to a 5 mm thick-walled NMR tube fitted with a Teflon valve. The sample was freeze-pump-thawed three times and pressurized with 8 atm  $\text{H}_2$ .

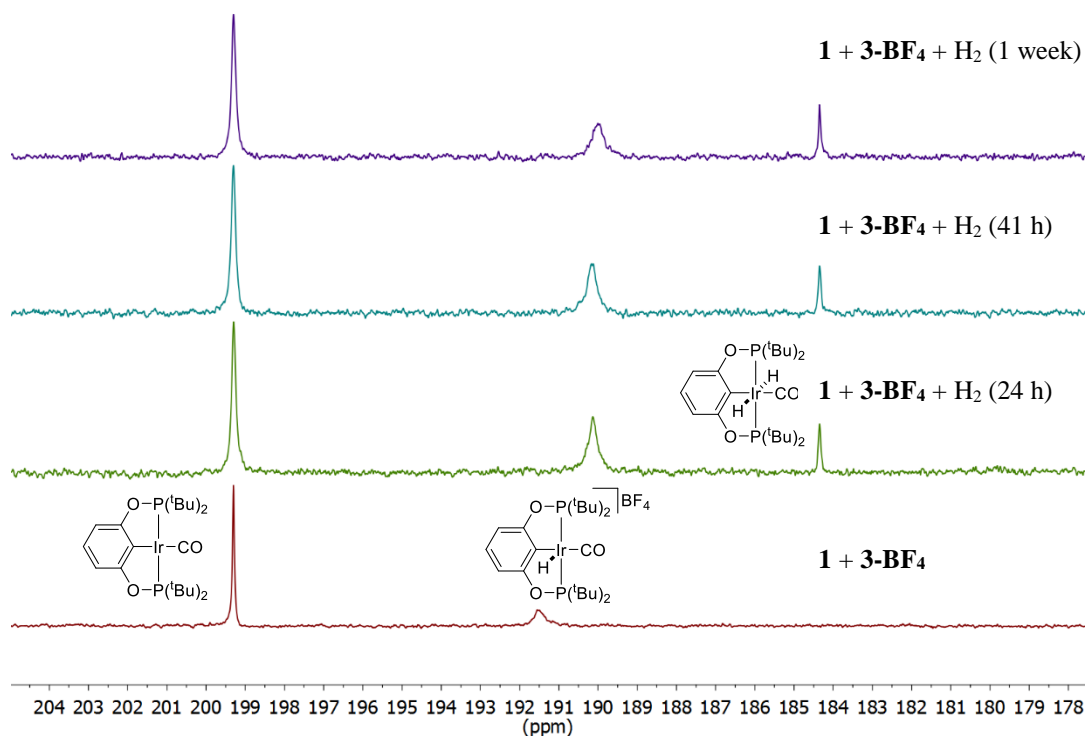

Figure S22. Stacked  $^{31}\text{P}\{^1\text{H}\}$  NMR spectra of proton-catalyzed hydrogen addition to  $(\text{tBu})_4(\text{POCOP})\text{Ir}(\text{CO})$  (**1**) with  $[(\text{tBu})_4(\text{POCOP})\text{Ir}(\text{CO})(\text{H})]\text{BF}_4$  (**3-BF<sub>4</sub>**) in  $\text{CD}_2\text{Cl}_2$ .

*Reaction of  $(i\text{Pr})_4(\text{POCOP})\text{Ir}(\text{CO})$  (**4**) with  $\text{H}_2$  (acid catalyzed with  $[\text{Hlut}]\text{BF}_4$ ).* In a nitrogen-filled glovebox,  $[\text{Hlut}]\text{BF}_4$  (20  $\mu\text{L}$ , 505 mM in  $\text{CH}_3\text{CN}$ , 0.010 mmol) was added to a 5 mm thick-walled NMR tube fitted with a Teflon valve. Solvent was removed under vacuum. A solution of  $(i\text{Pr})_4(\text{POCOP})\text{Ir}(\text{CO})$  (**4**) (11 mg, 0.020 mmol) in  $\text{THF-}d_8$  was added to the tube giving a dark yellow solution. The sample was freeze-pump-thawed three times and pressurized with 8 atm  $\text{H}_2$ . After mixing for 2 days, the solution turned colorless.

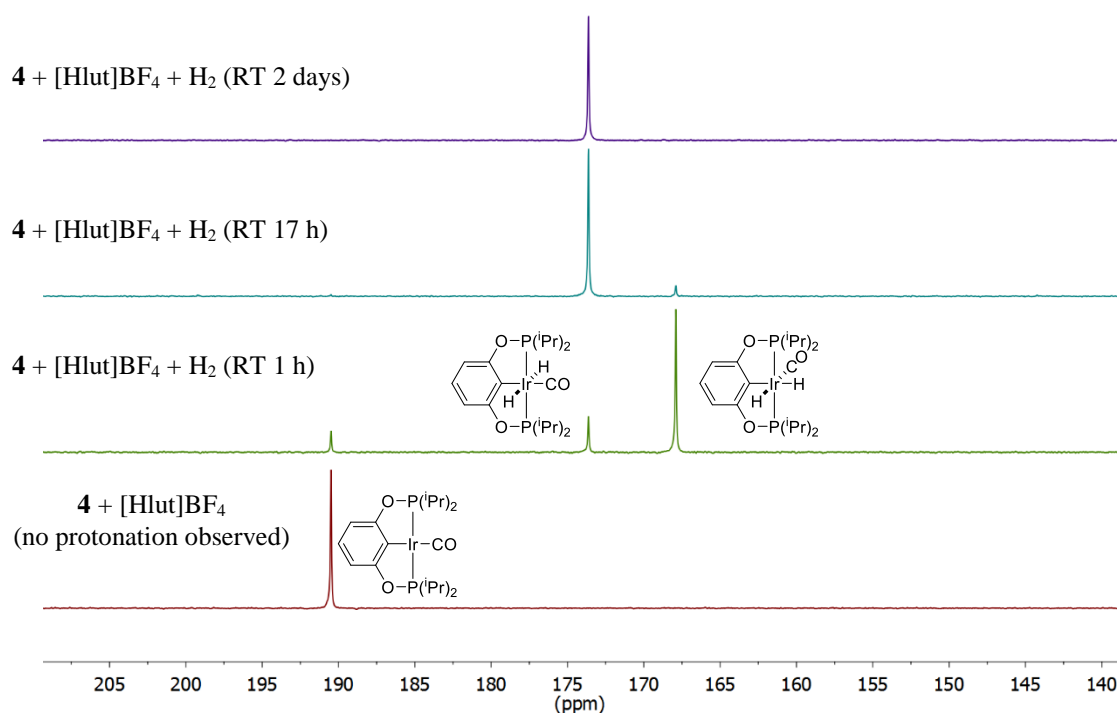

Figure S23. Stacked  $^{31}\text{P}\{^1\text{H}\}$  NMR spectra of proton-catalyzed hydrogen addition to  $(i\text{Pr})^4(\text{POCOP})\text{Ir}(\text{CO})$  (**4**) with [Hlut]BF<sub>4</sub> in THF-*d*<sub>8</sub>.

*Reaction of  $(i\text{Pr})^4(\text{POCOP})\text{Ir}(\text{CO})$  (**4**) with H<sub>2</sub> (acid catalyzed with [Hpyr]BF<sub>4</sub>).* In a nitrogen-filled glovebox, [Hpyr]BF<sub>4</sub> (8  $\mu\text{L}$ , 1 M in CH<sub>3</sub>CN, 0.008 mmol) was added to a 5 mm thick-walled NMR tube fitted with a Teflon valve. Solvent was removed under vacuum. A solution of  $(i\text{Pr})^4(\text{POCOP})\text{Ir}(\text{CO})$  (**4**) (10 mg, 0.018 mmol) in THF-*d*<sub>8</sub> was added to the tube; some undissolved [Hpyr]BF<sub>4</sub> was observed. The sample was freeze-pump-thawed three times and pressurized with 8 atm H<sub>2</sub>.

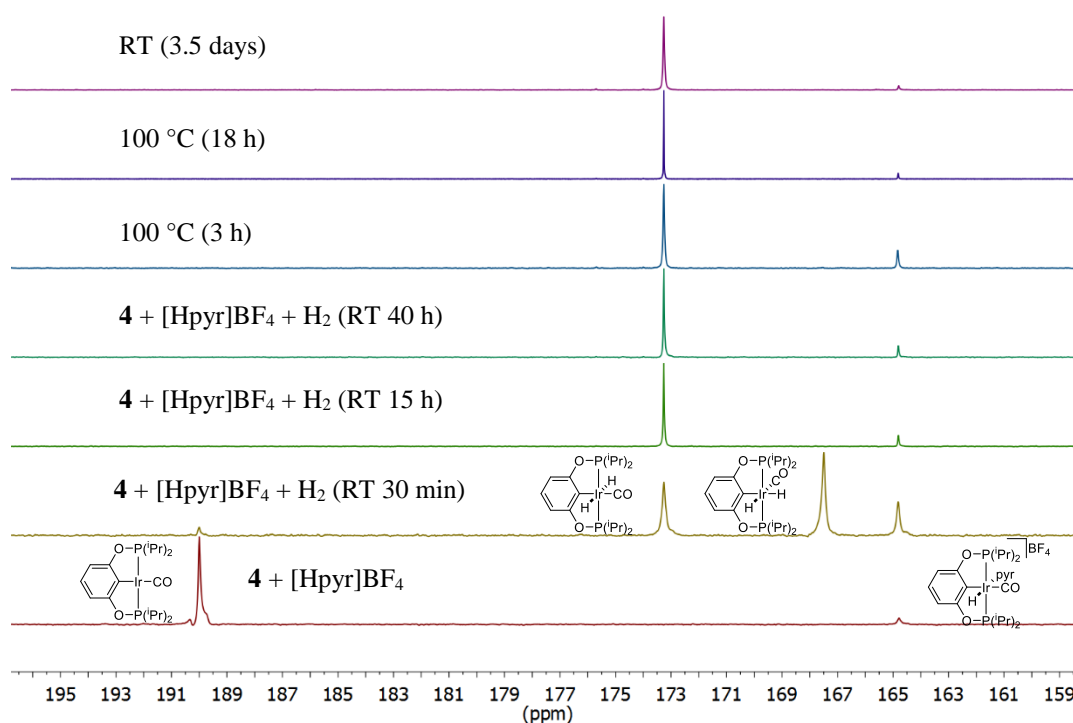

Figure S24. Stacked  $^{31}\text{P}\{^1\text{H}\}$  NMR spectra of proton-catalyzed hydrogen addition to  $(i\text{Pr})^4(\text{POCOP})\text{Ir}(\text{CO})$  (**4**) with  $[\text{Hpyr}]\text{BF}_4$  in  $\text{THF-}d_8$ .

*Reaction of  $(i\text{Pr})^4(\text{POCOP})\text{Ir}(\text{CO})$  (**4**) with  $\text{H}_2$  (acid catalyzed with  $[\text{Hpyr}]\text{BArF}_{20}$ ).* In a nitrogen-filled glovebox,  $[\text{Hpyr}]\text{BArF}_{20}$  (97  $\mu\text{L}$ , 100 mM in  $\text{CH}_3\text{CN}$ , 0.0097 mmol) was added to a 5 mm thick-walled NMR tube fitted with a Teflon valve. Solvent was removed under vacuum. A solution of  $(i\text{Pr})^4(\text{POCOP})\text{Ir}(\text{CO})$  (**4**) (11 mg, 0.020 mmol) in  $\text{THF-}d_8$  was added to the tube giving a dark yellow solution. The sample was freeze-pump-thawed three times and pressurized with 8 atm  $\text{H}_2$ . After mixing for 17 h, the solution turned colorless.

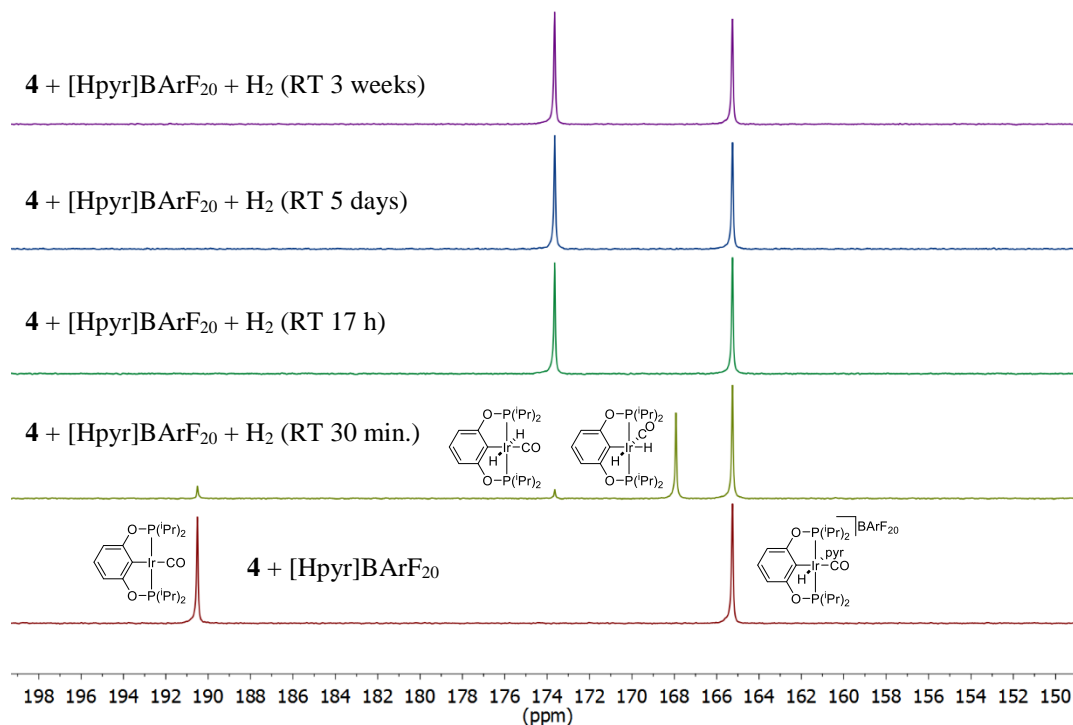

Figure S25. Stacked  $^{31}\text{P}\{^1\text{H}\}$  NMR spectra of proton-catalyzed hydrogen addition to  $[\text{iPr}^4(\text{POCOP})\text{Ir}(\text{CO})]$  (**4**) with  $[\text{Hpyr}]\text{BArF}_{20}$  in  $\text{THF-}d_8$ .

*Reaction of  $[\text{iPr}^4(\text{POCOP})\text{Ir}(\text{CO})]$  (**4**) and  $[\text{iPr}^4(\text{POCOP})\text{Ir}(\text{CO})(\text{H})(\text{pyr})]\text{BF}_4$  (**7-BF<sub>4</sub>**) with  $\text{H}_2$ .* In a nitrogen-filled glovebox,  $[\text{iPr}^4(\text{POCOP})\text{Ir}(\text{CO})(\text{H})(\text{pyr})]\text{BF}_4$  (**7-BF<sub>4</sub>**) (5 mg, 0.007 mmol) was dissolved in 50  $\mu\text{L}$   $\text{CH}_2\text{Cl}_2$  and added to a 5 mm thick-walled NMR tube fitted with a Teflon valve. The solvent was removed under vacuum. A yellow solution of  $[\text{iPr}^4(\text{POCOP})\text{Ir}(\text{CO})]$  (**4**) (10.5 mg, 0.0187 mmol) in  $\text{THF-}d_8$  was added to the tube; some **7-BF<sub>4</sub>** was undissolved. The sample was freeze-pump-thawed three times and pressurized with 8 atm  $\text{H}_2$ . After mixing for 4 days, the solution turned colorless. Minor impurities observed by  $^{31}\text{P}$  NMR after 4 days at room temperature are at 148.2 and 139.4 ppm. After pulling vacuum on the sample, the solution turned pale yellow.

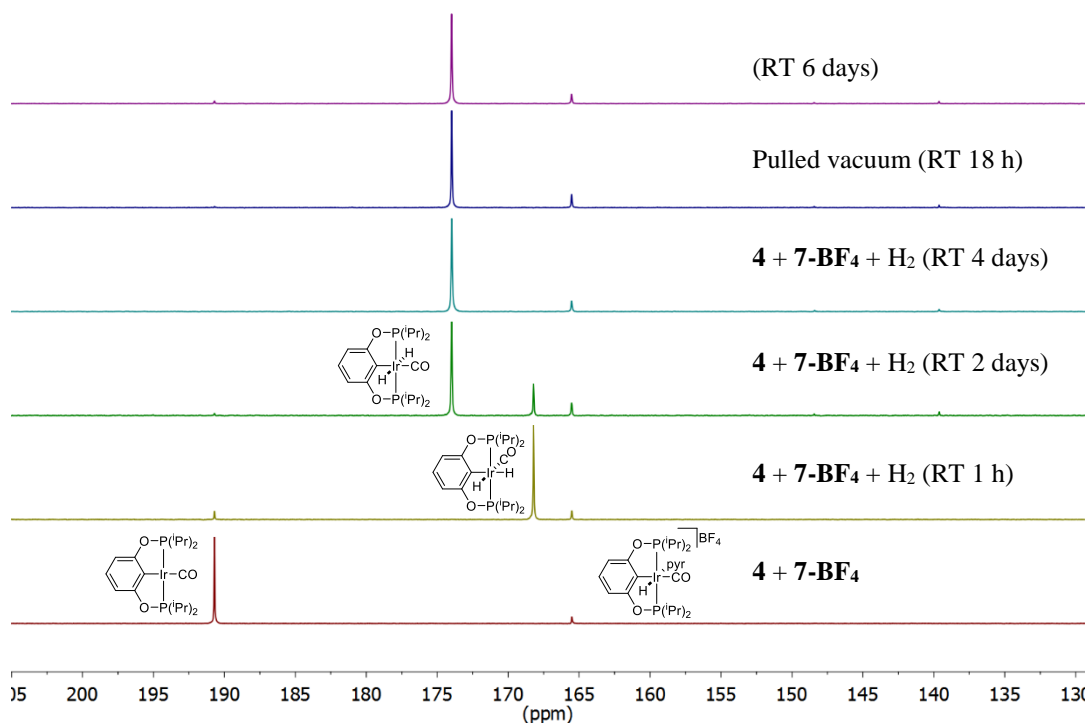

Figure S26. Stacked  $^{31}\text{P}\{^1\text{H}\}$  NMR spectra of proton-catalyzed hydrogen addition to  $(i\text{Pr})^4(\text{POCOP})\text{Ir}(\text{CO})$  (**4**) with  $[(i\text{Pr})^4(\text{POCOP})\text{Ir}(\text{CO})(\text{H})(\text{pyr})]\text{BF}_4$  (**7-BF<sub>4</sub>**) in  $\text{THF-}d_8$ .

*Reaction of  $\text{trans-}(i\text{Pr})^4(\text{POCOP})\text{Ir}(\text{CO})(\text{H})_2$  (**trans-5**) with  $[\text{Hpyr}]\text{BArF}_{20}$ .* In air,  $\text{trans-}(i\text{Pr})^4(\text{POCOP})\text{Ir}(\text{CO})(\text{H})_2$  (**trans-5**) (7.1 mg, 0.013 mmol) was added to an NMR tube fitted with a J. Young style Teflon valve and evacuated on a vacuum line. In a nitrogen-filled glovebox,  $[\text{Hpyr}]\text{BArF}_{20}$  (10.4 mg, 0.0137 mmol) was added followed by  $\text{THF-}d_8$  giving a colorless solution. After mixing at room temperature for 6 days, full conversion to  $[(i\text{Pr})^4(\text{POCOP})\text{Ir}(\text{CO})(\text{H})(\text{pyr})]\text{BArF}_{20}$  (**7-BArF<sub>20</sub>**) was observed by NMR spectroscopy. No color changes were observed.

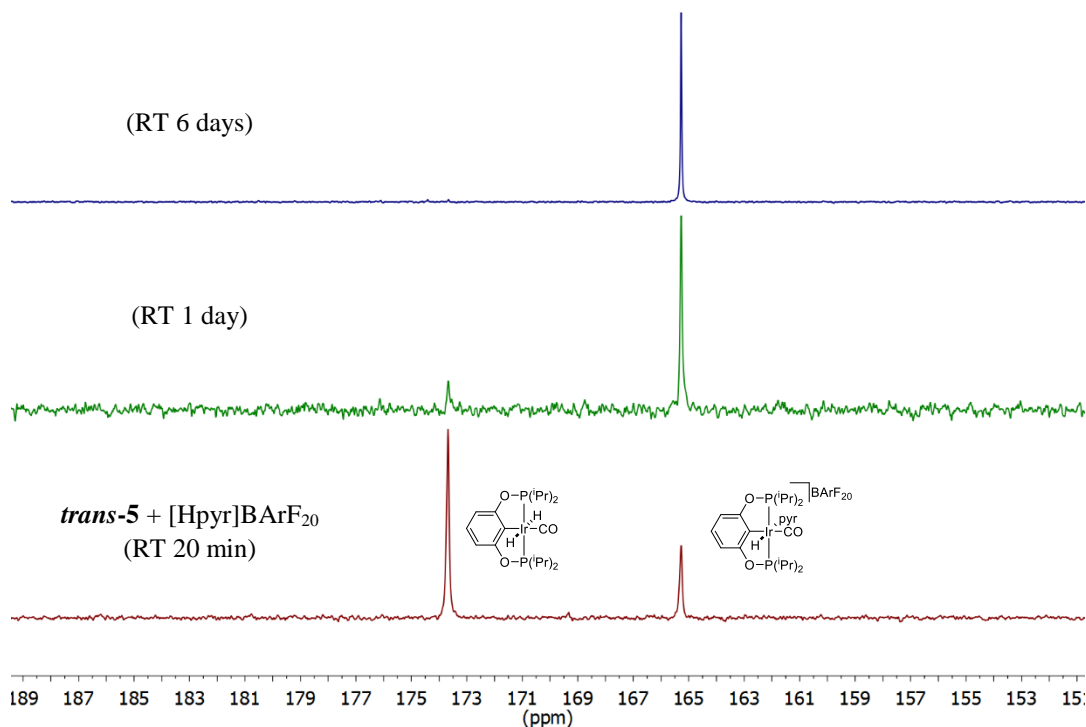

Figure S27. Stacked  $^{31}\text{P}\{^1\text{H}\}$  NMR spectra of reaction of *trans*- $^{(\text{iPr})4}(\text{POCOP})\text{Ir}(\text{CO})(\text{H})_2$  (*trans*-**5**) with [Hpyr]BArF<sub>20</sub> in THF-*d*<sub>8</sub>.

*Low temperature protonation of trans- $^{(\text{iPr})4}(\text{POCOP})\text{Ir}(\text{CO})(\text{H})_2$  (*trans*-**5**) with pTsOH.* In air, *trans*- $^{(\text{iPr})4}(\text{POCOP})\text{Ir}(\text{CO})(\text{H})_2$  (*trans*-**5**) (11.0 mg, 0.0195 mmol) was added to an NMR tube fitted with a J. Young style Teflon valve and evacuated on a vacuum line. In a nitrogen-filled glovebox, anhydrous *p*-toluenesulfonic acid (~25 mg, 0.15 mmol) was added to the tube. CD<sub>2</sub>Cl<sub>2</sub> was vacuum transferred and the sample was maintained at -196 °C. The sample was thawed to -78 °C and immediately inserted into a pre-cooled NMR probe at -80 °C. Formation of  $^{(\text{iPr})4}(\text{POCOP})\text{Ir}(\text{CO})(\text{H})(\text{OTs})$  (**9**) was immediately observed by NMR spectroscopy.

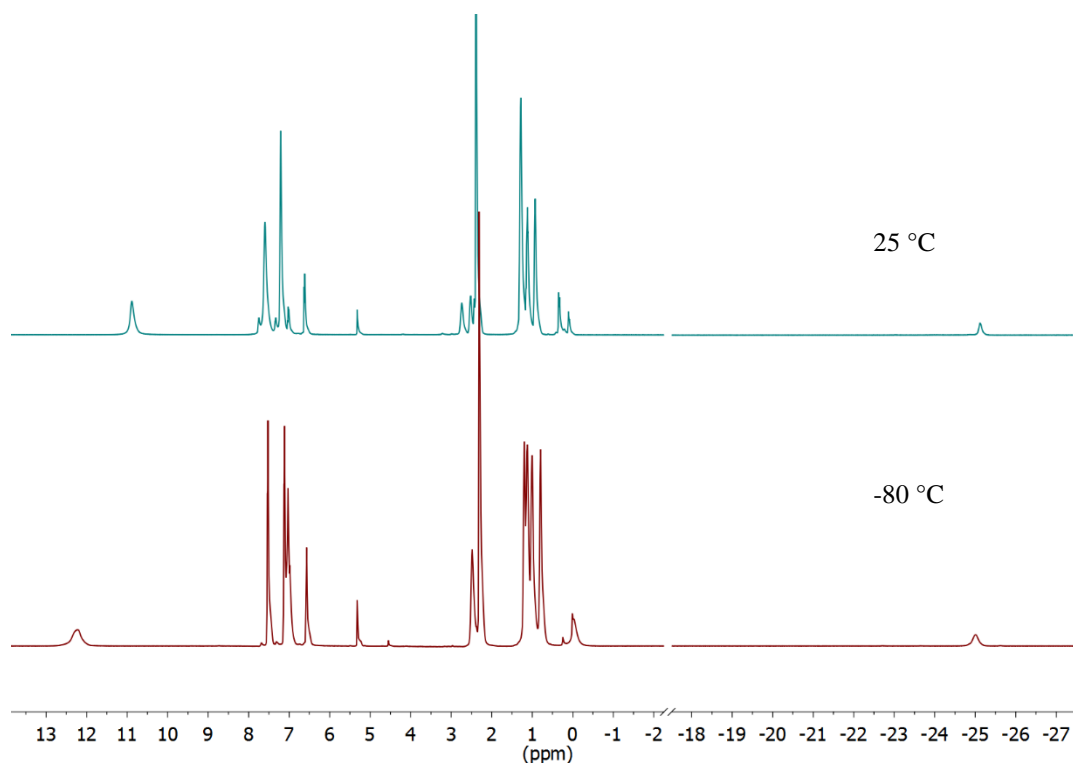

Figure S28. Stacked  $^1\text{H}$  NMR spectra of low temperature protonation of *trans*-(*iPr*) $_4$ (POCOP)Ir(CO)(H) $_2$  (**trans-5**) with *pTsOH* in  $\text{CD}_2\text{Cl}_2$ .

*Reaction of  $(^t\text{Bu})_4(\text{PCP})\text{Ir}(\text{CO})$  (**10**) with  $\text{H}_2$ .*  $(^t\text{Bu})_4(\text{PCP})\text{Ir}(\text{CO})$  (**10**) (4 mg, 0.007 mmol) dissolved in THF- $d_8$  or  $\text{C}_6\text{D}_6$  was added to a 5 mm thick-walled NMR tube fitted with a Teflon valve. The sample was subjected to three freeze-pump-thaw cycles and pressurized with 8 atm  $\text{H}_2$ . For  $\text{C}_6\text{D}_6$ : No amount of *trans*-( $^t\text{Bu}$ ) $_4(\text{PCP})\text{Ir}(\text{CO})(\text{H})_2$  (**11**) was observed after 7 days at 100 °C. For THF: Upon heating the sample at 100 °C for 4 days, 41% conversion to *trans*-( $^t\text{Bu}$ ) $_4(\text{PCP})\text{Ir}(\text{CO})(\text{H})_2$  (**11**) was observed. No change to the product ratio was observed after further heating for 3 more days.

*Reaction of  $(^t\text{Bu})_4(\text{PCP})\text{Ir}(\text{CO})$  (**10**) with  $\text{H}_2$  (1 atm, acid catalyzed).*  $[\text{Hpyr}]\text{BF}_4$  (5  $\mu\text{L}$ , 1 M in  $\text{CH}_3\text{CN}$ , 0.005 mmol) was added to an NMR tube fitted with a J. Young style Teflon valve and the solvent was removed under vacuum.  $(^t\text{Bu})_4(\text{PCP})\text{Ir}(\text{CO})$  (**10**) (8 mg, 0.0013 mmol) was dissolved in THF- $d_8$  and added to the tube to give a yellow solution. The sample was subjected to three freeze-pump-thaw cycles and pressurized with 1 atm  $\text{H}_2$ . No color change was observed. After 30 minutes at room temperature, the solution was found to contain  $(^t\text{Bu})_4(\text{PCP})\text{Ir}(\text{CO})$  (**10**) (10%), *trans*-( $^t\text{Bu}$ ) $_4(\text{PCP})\text{Ir}(\text{CO})(\text{H})_2$  (**11**) (82%) and  $[(^t\text{Bu})_4(\text{PCP})\text{Ir}(\text{CO})(\text{H})(\text{pyr})]\text{BF}_4$  (**12**) (8%). After a further 2 days at room temperature the ratio remained unchanged, though  $\text{H}_2$  was still observed in the  $^1\text{H}$  NMR spectrum.

*Reaction of  $(^t\text{Bu})_4(\text{PCP})\text{Ir}(\text{CO})$  (**10**) with  $\text{H}_2$  (1 atm, acid catalyzed) quenched with base.* To a J. Young NMR tube containing  $(^t\text{Bu})_4(\text{PCP})\text{Ir}(\text{CO})$  (**10**) (10%), *trans*-( $^t\text{Bu}$ ) $_4(\text{PCP})\text{Ir}(\text{CO})(\text{H})_2$  (**11**) (82%) and  $[(^t\text{Bu})_4(\text{PCP})\text{Ir}(\text{CO})(\text{H})(\text{pyr})]\text{BF}_4$  (**12**) (8%) in THF- $d_8$ , triethylamine (18  $\mu\text{L}$ , 0.013 mmol) was added under a flow of hydrogen.  $^{31}\text{P}$  NMR spectroscopy revealed complete conversion of  $[(^t\text{Bu})_4(\text{PCP})\text{Ir}(\text{CO})(\text{H})(\text{pyr})]\text{BF}_4$  (**12**) back to  $(^t\text{Bu})_4(\text{PCP})\text{Ir}(\text{CO})$  (**10**) and the concentration of

*trans*-(<sup>t</sup>Bu)<sup>4</sup>(PCP)Ir(CO)(H)<sub>2</sub> (**11**) remained unchanged. No change in ratio was observed after the sample was submitted to three freeze-pump-thaw cycles.

*Reaction of <sup>t</sup>(Bu)<sup>4</sup>(PCP)Ir(CO) (10) with H<sub>2</sub> (8 atm, acid catalyzed with [Hpyr]BF<sub>4</sub>). [Hpyr]BF<sub>4</sub> (4 μL, 1 M in CH<sub>3</sub>CN, 0.004 mmol) was added to a 5 mm thick-walled NMR tube fitted with a Teflon valve using a glass syringe. The solvent was removed *in vacuo* and <sup>t</sup>(Bu)<sup>4</sup>(PCP)Ir(CO) (**10**) (4 mg, 0.007 mmol) dissolved in THF-*d*<sub>8</sub> was added to the tube. The sample was subjected to three freeze-pump-thaw cycles and pressurized with 8 atm H<sub>2</sub>. An immediate color change from yellow to colorless was observed. NMR spectroscopy revealed quantitative conversion to *trans*-(<sup>t</sup>Bu)<sup>4</sup>(PCP)Ir(CO)(H)<sub>2</sub> (**11**). Removal of H<sub>2</sub> atmosphere gave partial conversion back to <sup>t</sup>(Bu)<sup>4</sup>(PCP)Ir(CO) (**10**). *trans*-(<sup>t</sup>Bu)<sup>4</sup>(PCP)Ir(CO)(H)<sub>2</sub> (**11**). <sup>1</sup>H NMR (THF-*d*<sub>8</sub>, 499.71 MHz): δ 6.77 (d, <sup>3</sup>J<sub>HH</sub> = 7.6 Hz, 2H; Ar-*H*), 6.60 (t, <sup>3</sup>J<sub>HH</sub> = 7.2 Hz, 1H; Ar-*H*), 3.43 (vt, <sup>2</sup>J<sub>PH</sub> + <sup>4</sup>J<sub>PH</sub> = 3.8 Hz, 4H; ArCH<sub>2</sub>PR<sub>2</sub>), 1.35 (vt, <sup>2</sup>J<sub>PH</sub> + <sup>4</sup>J<sub>PH</sub> = 6.5 Hz, 36H; PC(CH<sub>3</sub>)<sub>3</sub>), -9.74 (t, <sup>2</sup>J<sub>PH</sub> = 14 Hz, 2H; Ir-*H*). <sup>31</sup>P{<sup>1</sup>H} NMR (THF-*d*<sub>8</sub>, 202.31 MHz): δ 75.3 (s).*

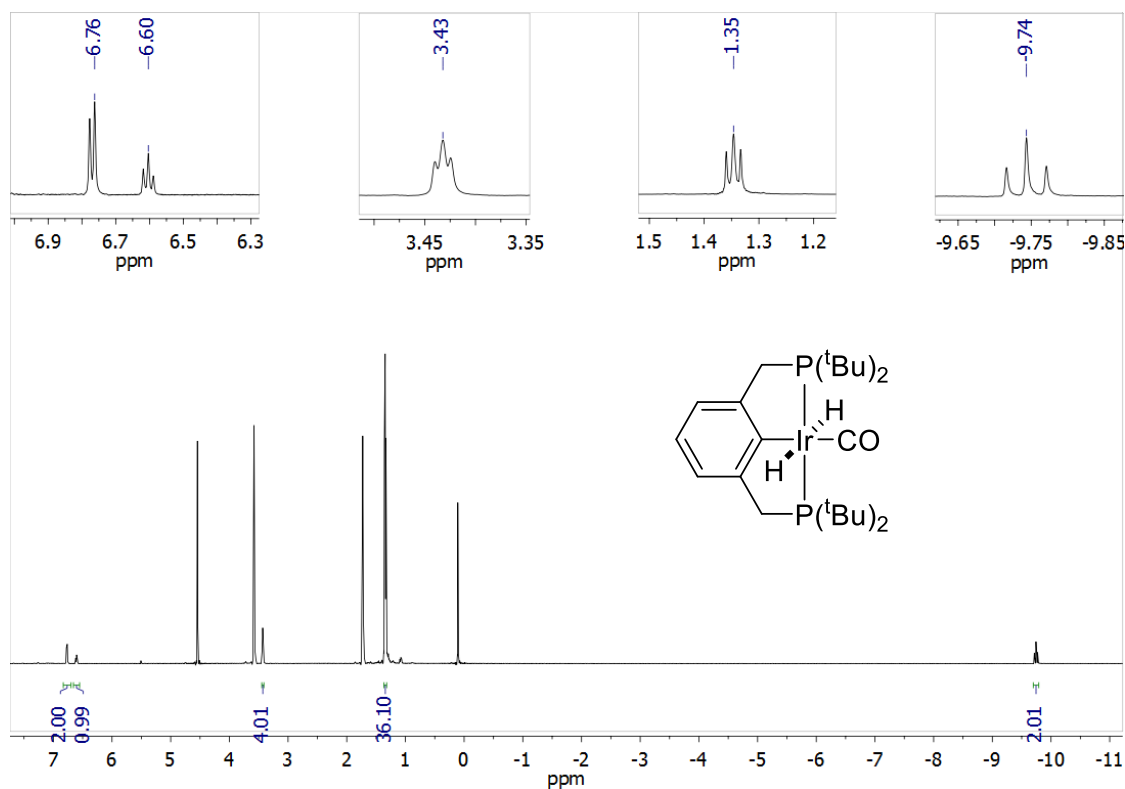

Figure S29. <sup>1</sup>H NMR spectrum of *trans*-(<sup>t</sup>Bu)<sup>4</sup>(PCP)Ir(CO)(H)<sub>2</sub> (**11**) in THF-*d*<sub>8</sub>

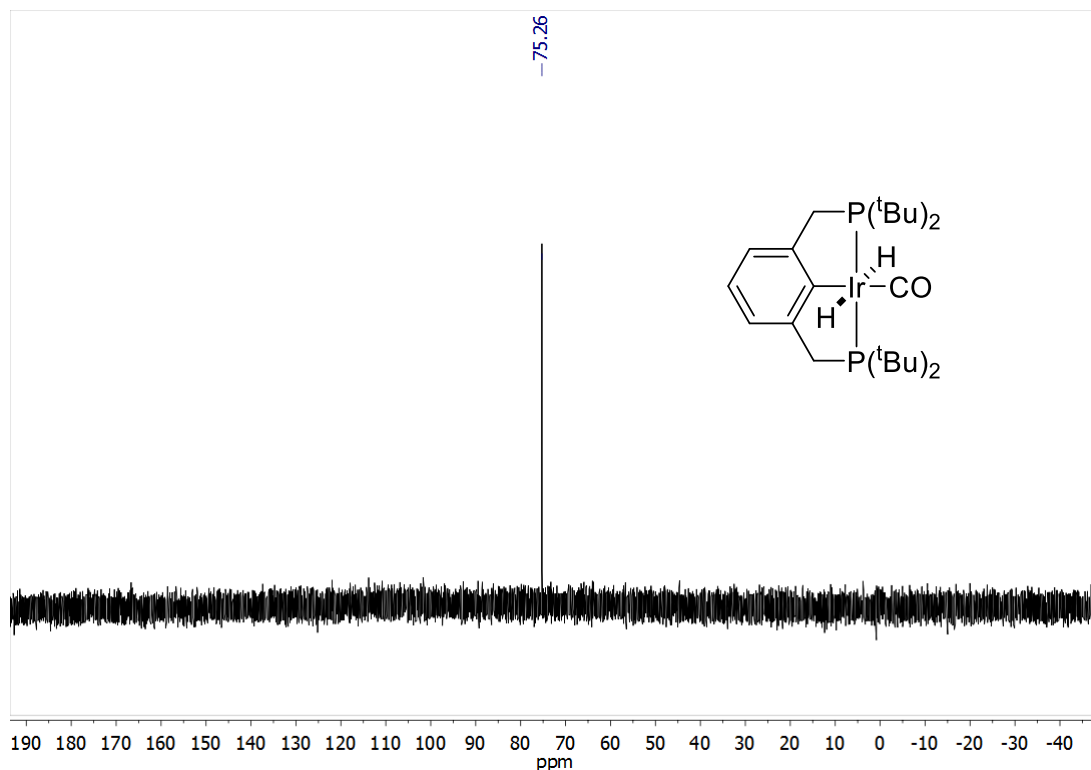

Figure S30.  $^{31}\text{P}\{^1\text{H}\}$  NMR spectrum of  $\text{trans}^{-(\text{tBu})_4}(\text{PCP})\text{Ir}(\text{CO})(\text{H})_2$  (**11**) in  $\text{THF-}d_8$

*Reaction of  $[(^{\text{tBu}})_4(\text{PCP})\text{Ir}(\text{CO})(\text{H})(\text{pyr})]\text{BF}_4$  (**12**) with  $\text{H}_2$ .*  $[(^{\text{tBu}})_4(\text{PCP})\text{Ir}(\text{CO})(\text{H})(\text{pyr})]\text{BF}_4$  (**12**) (3.5 mg, 0.004 mmol) was dissolved in  $\text{THF-}d_8$  and added to a 5 mm thick-walled NMR tube fitted with a Teflon valve. The solution was freeze-pump-thawed three times and placed under 8 atm  $\text{H}_2$ . Quantitative conversion to  $\text{trans}^{-(\text{tBu})_4}(\text{PCP})\text{Ir}(\text{CO})(\text{H})_2$  (**11**) was observed by  $^1\text{H}$  NMR and  $^{31}\text{P}$  NMR spectroscopy.

*Reaction of  $^{(\text{iPr})_4}(\text{PCP})\text{Ir}(\text{CO})$  (**13**) with  $\text{H}_2$  (8 atm, acid catalyzed with  $[\text{Hpyr}]\text{BF}_4$ ).*  $[\text{Hpyr}]\text{BF}_4$  (4  $\mu\text{L}$ , 1 M in  $\text{CH}_3\text{CN}$ , 0.004 mmol) was added to a 5 mm thick-walled NMR tube fitted with a Teflon valve using a glass syringe. The solvent was removed *in vacuo* and  $^{(\text{iPr})_4}(\text{PCP})\text{Ir}(\text{CO})$  (**13**) (3.9 mg, 0.007 mmol) dissolved in  $\text{THF-}d_8$  was added to the tube. The sample was subjected to three freeze-pump-thaw cycles and pressurized with 8 atm  $\text{H}_2$ . An immediate color change from yellow to colorless was observed. NMR spectroscopy revealed conversion to  $\text{trans}^{-(\text{iPr})_4}(\text{PCP})\text{Ir}(\text{CO})(\text{H})_2$  (**14**) and  $[(^{\text{iPr}})_4(\text{PCP})\text{Ir}(\text{CO})(\text{H})(\text{pyr})]\text{BF}_4$  (**15**) (37:63). The ratio of products remained constant after mixing at room temperature for an additional 2 days. NMR data for **14** are consistent with previous reports.<sup>4</sup>

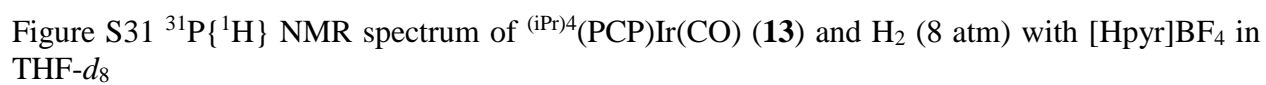

### **pK<sub>a</sub> Determination of [(<sup>t</sup>Bu)<sup>4</sup>(POCOP)Ir(CO)(H)]BArF<sub>20</sub> (**3-BArF<sub>20</sub>**)**

In a nitrogen-filled glovebox, 24.1 mg (0.0186 mmol) **3-BArF<sub>20</sub>** was dissolved in a mixture of CD<sub>2</sub>Cl<sub>2</sub> and CH<sub>2</sub>Cl<sub>2</sub> (0.3 mL and 2 mL respectively) giving a yellow/orange solution. To this solution was added 1 equiv. *N,N*-dimethylaniline (100  $\mu$ L of 0.19 M solution in CH<sub>2</sub>Cl<sub>2</sub>). Another 2 mL CH<sub>2</sub>Cl<sub>2</sub> was added to ensure complete solubility of all species present; (<sup>t</sup>Bu)<sup>4</sup>(POCOP)Ir(CO) (**1**) has lower solubility than **3-BArF<sub>20</sub>** in CH<sub>2</sub>Cl<sub>2</sub>. A 0.4 mL aliquot was taken from the solution and analyzed by <sup>1</sup>H and <sup>31</sup>P NMR spectroscopy. The same experiment was repeated with 1.1 equiv. *N,N*-dimethylaniline and similar results were obtained (*vide infra*).

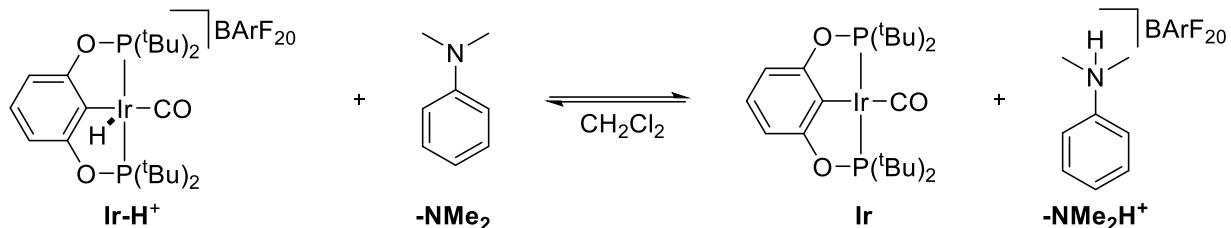

1 equiv. **Ir-H<sup>+</sup>** and 1 equiv. **-NMe<sub>2</sub>**; ratios of each species at equilibrium by <sup>1</sup>H and <sup>31</sup>P NMR:

$$\text{Ir-H}^+ = 0.27 \quad \text{-NMe}_2 = 0.27 \quad \text{Ir} = 0.73 \quad \text{-NMe}_2\text{H}^+ = 0.73$$

The ratios represented are the average of the ratios observed at 1 h and 24 h. There was minimal change in the ratios between 1 h and 24 h. There is an equilibrium between **-NMe<sub>2</sub>** and **-NMe<sub>2</sub>H<sup>+</sup>**, thus only 1 set of signals is observed by <sup>1</sup>H NMR for the weighted average of the two species;<sup>5</sup> when integrated versus the total <sup>t</sup>Bu protons for **Ir** and **Ir-H<sup>+</sup>**, the integration of **-NMe<sub>2</sub>**/**-NMe<sub>2</sub>H<sup>+</sup>** represents 1 equiv. The ratios of **Ir** and **Ir-H<sup>+</sup>** at equilibrium were experimentally determined by integrating the <sup>31</sup>P NMR spectra; they were the only <sup>31</sup>P containing species present. Characteristic <sup>1</sup>H NMR aromatic signals for **Ir** and **Ir-H<sup>+</sup>** were also integrated and the ratios obtained were in line with those from the <sup>31</sup>P NMR spectra. The ratio of **-NMe<sub>2</sub>** present at equilibrium was determined by subtracting the ratio of **Ir** from the number of equivalents of **-NMe<sub>2</sub>** initially added. The ratio of **-NMe<sub>2</sub>H<sup>+</sup>** should be equal to that of **Ir**. The experimentally determined pK<sub>a</sub><sup>THF</sup>(**-NMe<sub>2</sub>H<sup>+</sup>**) is 4.9.<sup>6</sup> It has been previously been shown that for metal-hydride complexes, pK<sub>a</sub><sup>THF</sup>  $\approx$  pK<sub>a</sub><sup>CH<sub>2</sub>Cl<sub>2</sub></sup>.<sup>7</sup>

The ratio of each species at equilibrium was substituted into the following equilibrium expression:

$$K = \frac{[\text{Ir}][\text{-NMe}_2\text{H}^+]}{[\text{Ir-H}^+][\text{-NMe}_2]} = \frac{(0.73)^2}{(0.27)^2} = 7.31$$

The pK<sub>a</sub> of **Ir-H<sup>+</sup>** was obtained by referencing versus the known pK<sub>a</sub> of **-NMe<sub>2</sub>H<sup>+</sup>** in the following equation:<sup>8</sup>

$$\text{pK}_a(\text{Ir-H}^+) = \text{pK}_a(\text{-NMe}_2\text{H}^+) - \log K$$

$$\text{pK}_a(\text{Ir-H}^+) = 4.9 - \log(7.31) = 4.0$$

The analogous calculation was performed when 1.1 equiv. *N,N*-dimethylaniline was used and a pK<sub>a</sub> of 4.0 was also obtained. Therefore, pK<sub>a</sub><sup>CH<sub>2</sub>Cl<sub>2</sub></sup>(**Ir-H<sup>+</sup>**) = 4.0  $\pm$  0.1.

### *Solubility Observations from $pK_a$ Studies*

Studies of the  $pK_a$  values for **3-BF<sub>4</sub>** showed that limited solubility of salts could give misleading results. When deprotonation of **3-BF<sub>4</sub>** was screened with a series of bases, solid precipitates formed even in the presence of weak bases. Once the more soluble **3-BArF<sub>20</sub>** was studied for deprotonation, there was no driving force for salt formation. Pyridine was not a suitable base for deprotonation, since it coordinated as a sixth ligand to an unsaturated Ir center to give **8**. When **1** was reacted with [Hpyr]BF<sub>4</sub> in CD<sub>2</sub>Cl<sub>2</sub>, protonation was not obtained, likely due to the limited solubility of [Hpyr]BF<sub>4</sub> and the corresponding Ir(III) adduct. Protonation of **1** with pyridinium is complicated by the complexation of pyridine. While pyridine is a better base than **1** based on the experimentally determined  $pK_a$  of **3-BArF<sub>20</sub>** and a simple acid-base reaction would not be expected, formation of **8** is observed. This is likely due to formation of a soluble octahedral Ir(III) compound where pyridine can stabilize an unsaturated Ir(III) metal center. Further support for the competition of an acid-base reaction versus stabilization of an unsaturated metal center was found when **3-BArF<sub>20</sub>** was completely deprotonated by the non-coordinating base 2,6-lutidine rather than coordination of the lutidine moiety in the sixth coordination site. In this case, deprotonation is favored over coordination of a sixth ligand since 2,6-lutidine is sterically hindered.

## Hydrogen Pressurization System<sup>9</sup>

### *Assembly of High Pressure Setup*

Figure S32 is an illustration of the complete hydrogen delivery system. 3/8" Copper tubing was connected to the H<sub>2</sub> regulator with a compression fitting. A coil was placed in the copper tubing to allow for flexibility. The majority of joints were connected by soldering with 3/8" copper tees and 7/8" couplings. 90° joints in copper tubing were achieved by use of compression fittings and Teflon tape to seal the joint. Two needle valves were fitted to the apparatus. One valve is for connecting to a Schlenk line if reduced pressure is necessary. The other needle valve connects to an oil bubbler for purging, checking for leaks, and venting the system. Currently, our system is fitted with a 100 psig (max) pressure gauge, however any gauge with an NPT (national pipe thread) fitting is suitable. If higher pressures are desired, accommodations must be made as current needle valves are only rated to 150 psi.

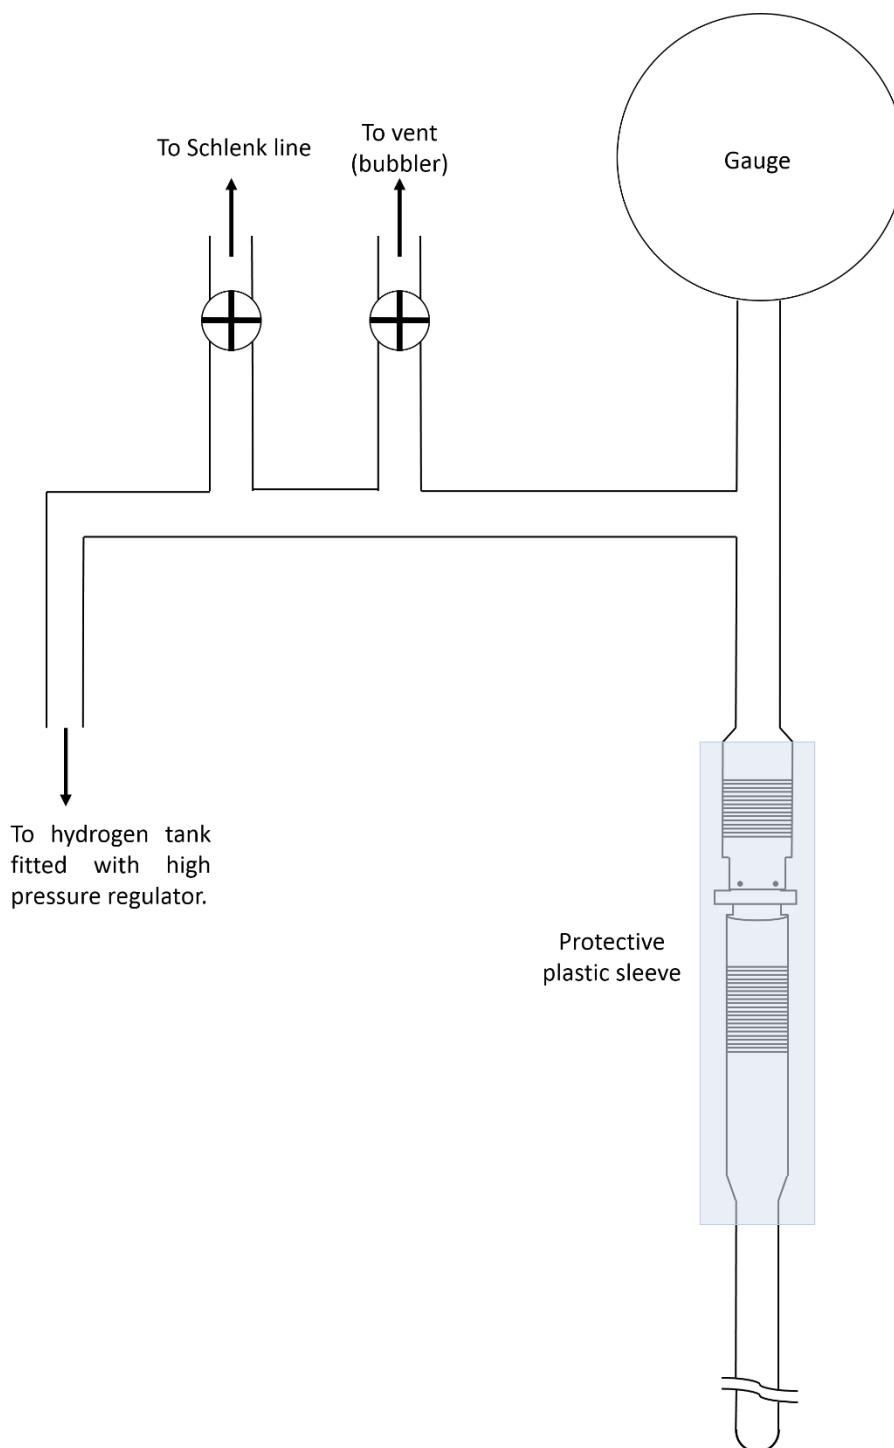

Figure S32. Illustration of H<sub>2</sub> delivery system.

Due to the “right-handed” threading of the glass and Teflon pin, the connection of the Teflon pin to the brass fitting is important (Figure S33). To prevent loosening the Teflon cap from the brass fitting while attaching and detaching the tube, set screws are used to secure the cap in place. The Teflon pins have been modified after purchase to accommodate the pressurization system. To prevent opening the seal between the glass and Teflon pin while removing the tube

from the system, grooves were cut into the Teflon pin. A custom wrench made to fit the grooves is used to loosen only the cap from the brass system. This results in removal of the NMR tube without releasing any pressure.

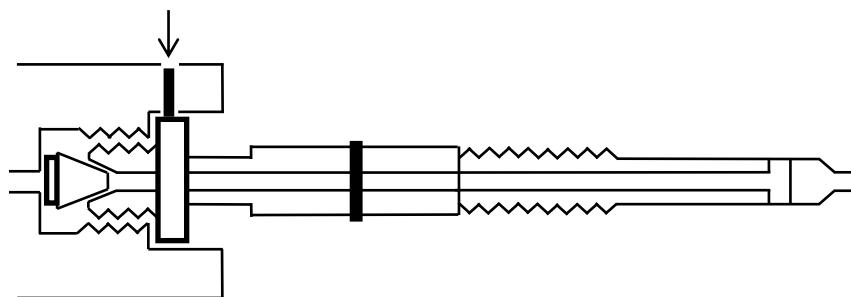

Figure S33. Depiction of Teflon fitting for high pressure tubes while attached to the H<sub>2</sub> system. Arrow indicates placement of setscrew to hold Teflon fitting in place. Another setscrew is placed 90° from the indicated setscrew.

#### *How to Pressurize an NMR Tube*

**Caution:** Hydrogen is an extremely flammable gas. Remove all open flames while system is in use. While dealing with high pressures, use all safety precautions including but not limited to Kevlar gloves and sleeves, lab coat, facemask, and blast shields. Do not operate system while alone. While transporting tubes, secondary, shatter-proof containment should always be used.

The NMR sample is degassed by three freeze-pump-thaw cycles by screwing the NMR tube into the custom attachment made to fit a Schlenk line (Figure S34). After the sample has been degassed it is ready for pressurization. Twist the tube into the open end of the apparatus (finger tight). Using the custom wrench, tighten the Teflon pin into the brass fitting using the customized grooves and turn clockwise (Figure S35 and S36; caution, over tightening the cap at this point can lead to disfiguration of the Teflon pin at the threading as well as the customized groove). With the small allen wrench, tighten both set screws into place (*vide infra*, Figure S40). The Teflon pin should be secured and leak free. Raise the plastic protective sleeve around the tube and screw on completely (*vide infra*, Figure S38).

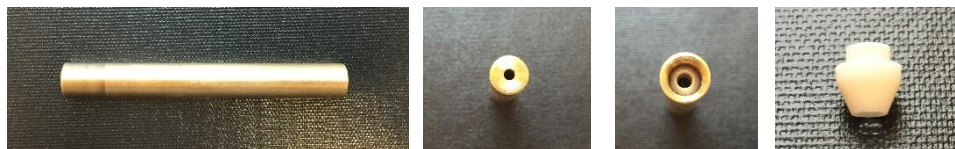

Figure S34. From left to right: i) Brass custom piece to fit tubes to Schlenk Line. ii) Top of piece. A small valve for gas and vacuum flow. iii) Bottom of piece. Threading to match Teflon pin and Teflon ferrule to ensure a tight seal to tube. iv) Teflon ferrule. This is affixed to the brass piece with a silicon based sealant.

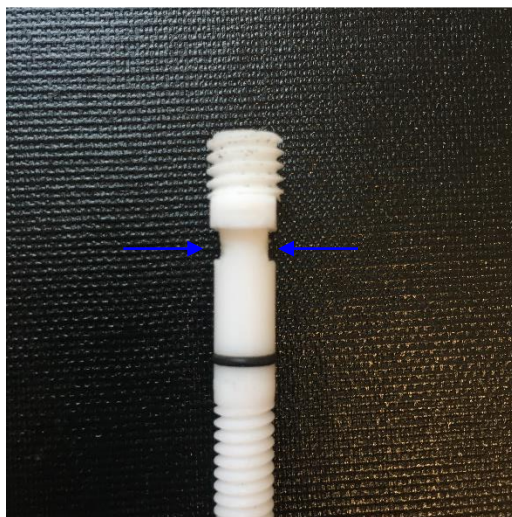

Figure S35. Teflon pin after modification. Modification highlighted with blue arrows.

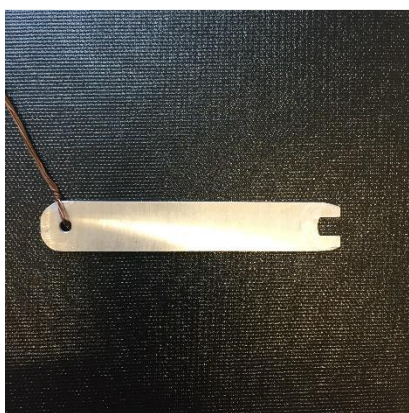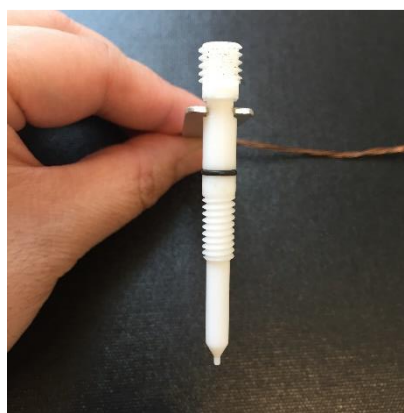

Figure S36. Left: Customized wrench for securing and removing NMR tube from system. Right: Wrench positioned in customized grooves on Teflon pin.

With the vacuum needle valve closed and the vent valve open, turn on the hydrogen tank and achieve a moderate flow of hydrogen. Purge the system for approximately 15 minutes. After venting is finished, close the vent valve and carefully raise the pressure to 20 psig. Ensure that the gauge on the pressurization system and the secondary gauge on the regulator are reading the same value. While pressurizing, leaks are more likely to occur from the needle valve, this can be identified by bubbles in the oil. Tighten the needle valve if necessary. Once the system has been checked, the tube can be opened by twisting the neck of the tube (under the plastic protective sleeve) counter-clockwise. With the tube open, raise the pressure delivered from the regulator by controlling the diaphragm to the desired pressure. Once achieved, close the tube by twisting the tube clockwise. Close the H<sub>2</sub> tank at the main valve, ensuring to leave the needle valve on the

regulator open. Slowly open the vent valve and release the pressure in the system. Once the pressure is released, close the needle valve on the regulator. Remove the plastic safety sleeve from the system and loosen the allen screws. Using the wrench, carefully remove the tube by twisting counter-clockwise. Place the tube in secondary containment.

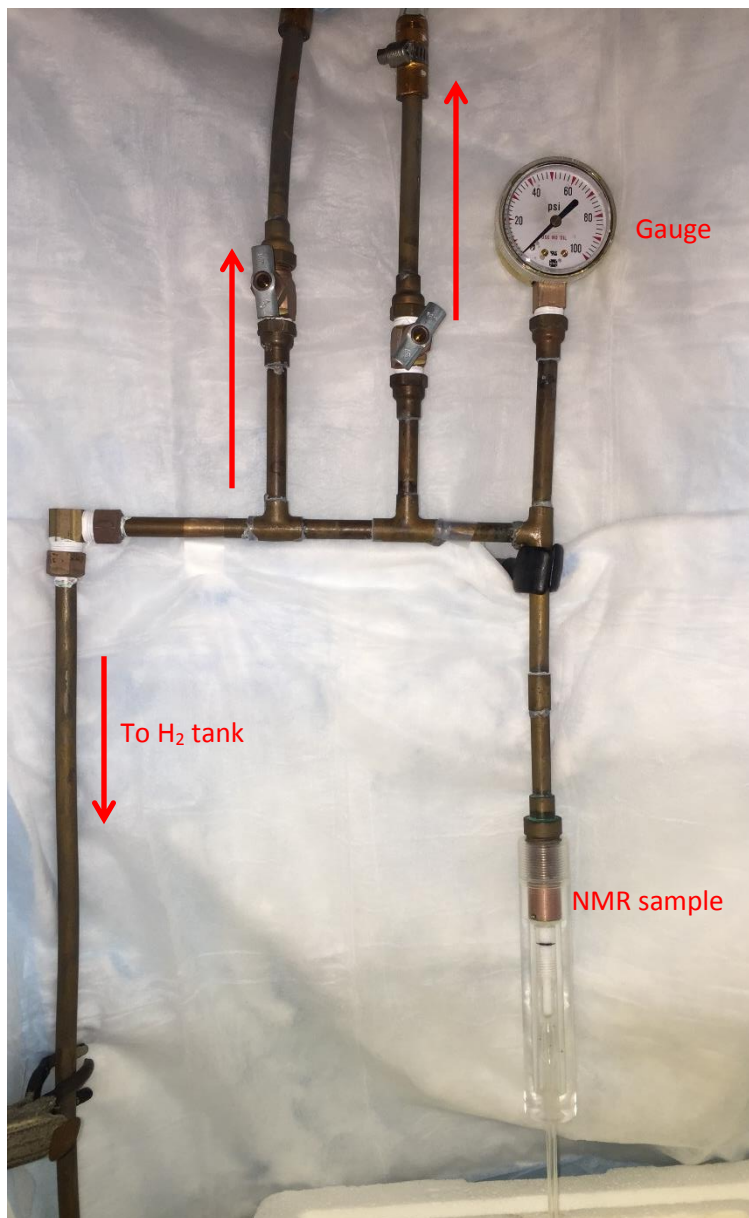

Figure S37. H<sub>2</sub> delivery system.

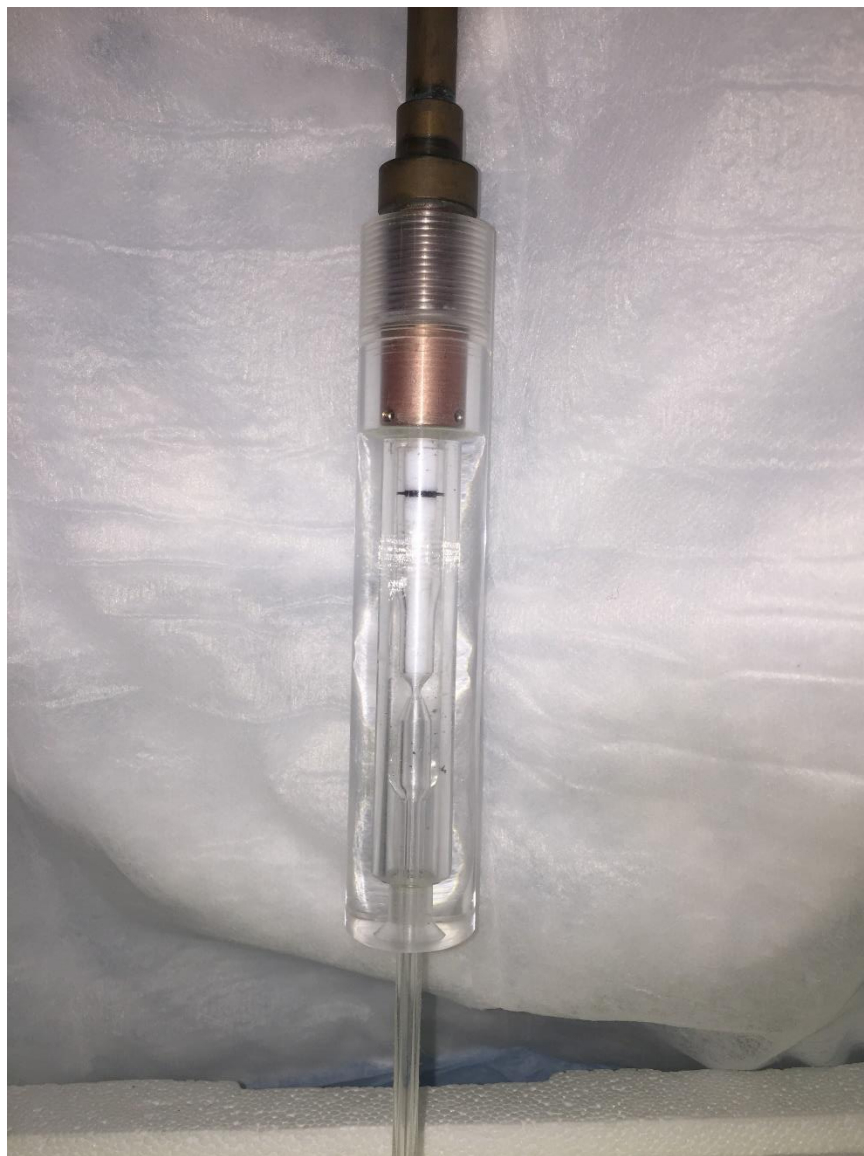

Figure S38. Close-up of sample attachment to apparatus.

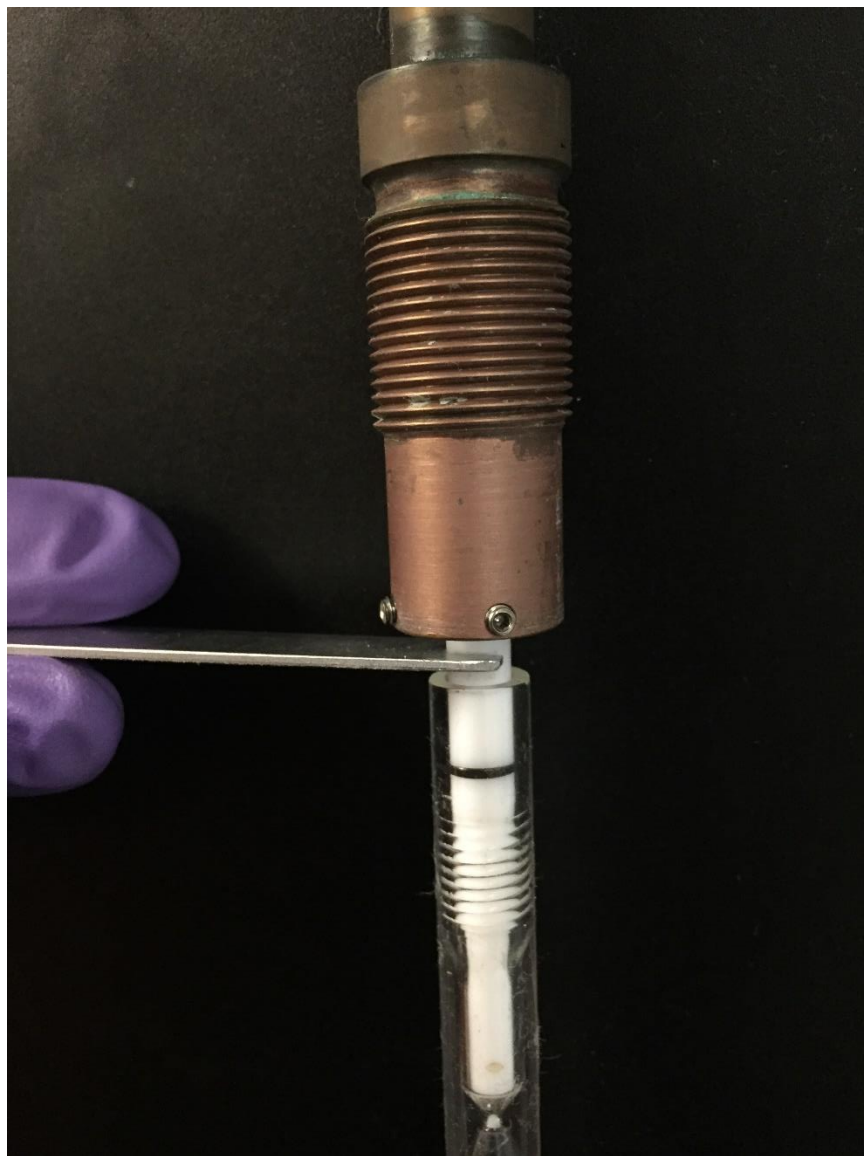

Figure S39. Using the custom wrench to tighten sample to copper fitting on H<sub>2</sub> apparatus. It is especially important to use the custom wrench when removing the sample to prevent venting the pressure in the sample.

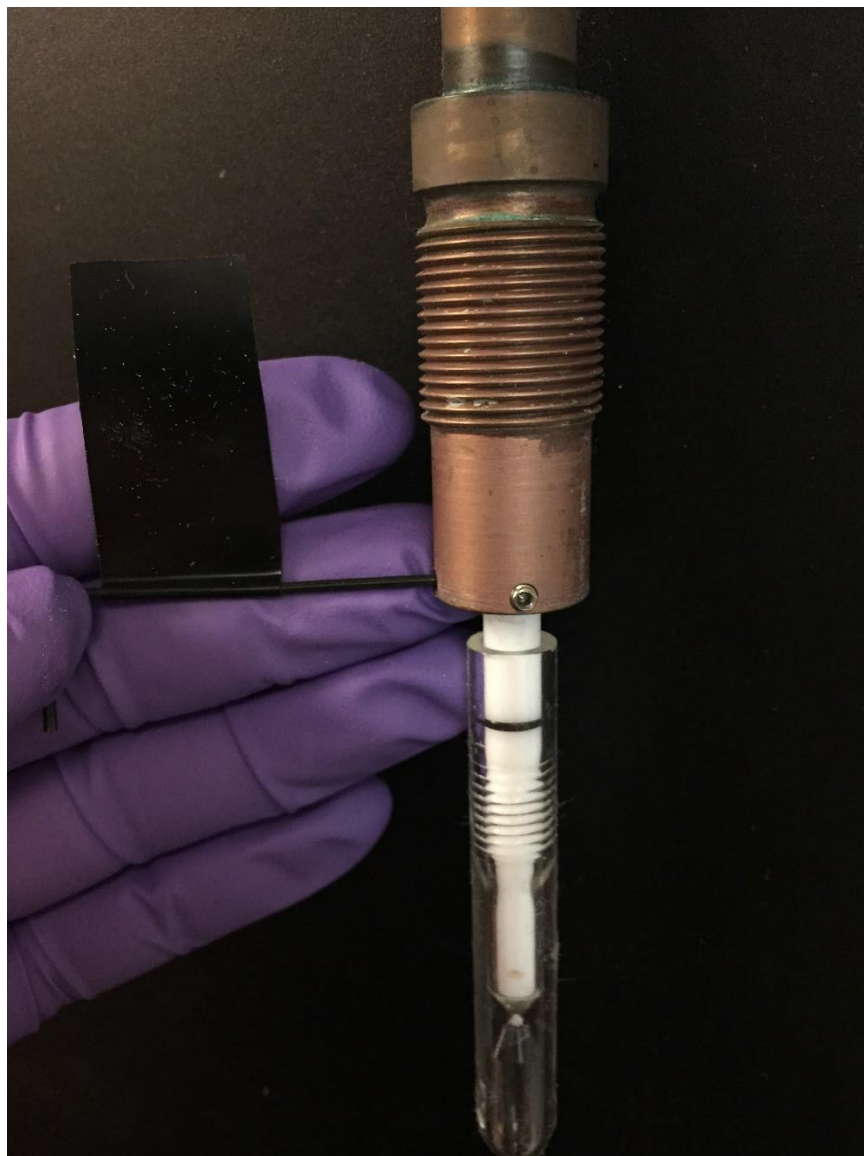

Figure S40. Tightening one of two set screws to secure Teflon pin. By tightening the set screws, the Teflon cap will not be loosened while manipulating sample during pressurization.

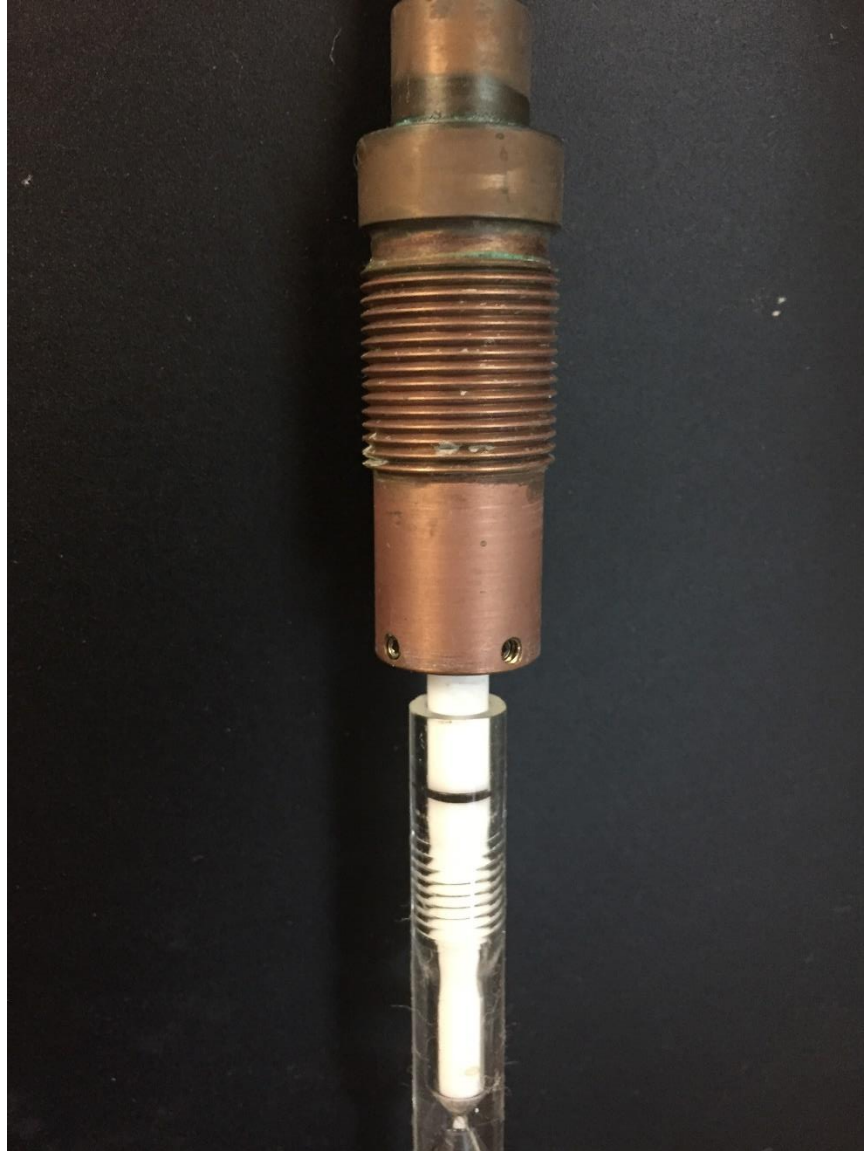

Figure S41. Both set screws tightened. The sample is ready for the plastic protective sleeve.

#### *Part Numbers*

The following parts were used to assemble the custom-made pressurization system:

3/8" copper piping

3/8" compression fittings

3/8" copper tees, couplings, and elbows

1/4" NPT fittings

Wilmad-LabGlass:

|          |                                                                              |
|----------|------------------------------------------------------------------------------|
| 522-PV-7 | 5 mm heavy wall precision pressure/vacuum valve NMR sample tube 7" L, 500MHz |
| OF-70    | Polytetrafluoroethylene (PTFE) stepped cone ferrule                          |
| PV-ANV   | Needle valve                                                                 |
| PV-ANV-O | O-Ring for needle valve                                                      |

VWR (USA):

|            |                                                                                                       |
|------------|-------------------------------------------------------------------------------------------------------|
| 55850-275  | VWR Heavy-duty single-stage gas regulator<br>Delivery pressure: 600 psig; Supply pressure: 4,000 psig |
| 300007-378 | Welding and compressed gas gauge, Ametek U.S. gauge                                                   |

Grainger:

|       |                                                                                 |
|-------|---------------------------------------------------------------------------------|
| 1VPW3 | Needle valve, straight, brass, ¼ in., MNPT<br>Maximum pressure limit of 150 psi |
|-------|---------------------------------------------------------------------------------|

**X-ray Crystallography**

X-ray diffraction experiments were carried out on a Bruker APEX II single crystal X-ray diffractometer using Mo-radiation ( $\lambda = 0.71073 \text{ \AA}$ ) at  $-173 \text{ }^{\circ}\text{C}$ . The crystals were mounted on loops with immersion oil. The data was integrated and scaled using SAINT, SADABS within the APEX2 software package by Bruker.<sup>10</sup> Structures ***trans*-5** and **7-BF<sub>4</sub>** were solved by direct methods (SHELXS, SIR97<sup>11</sup>) producing a complete heavy atom phasing model consistent with the proposed structure. The structures were completed by difference Fourier synthesis with SHELXL97.<sup>12</sup> Scattering factors are from Waasmair and Kirfel.<sup>13</sup> Using Olex2,<sup>14</sup> structures **12** and **[<sup>i</sup>Pr)<sub>4</sub>(PCP)Ir]<sub>2</sub>( $\mu$ -N<sub>2</sub>)** were solved with the XS<sup>15</sup> structure solution program using direct or Patterson methods and refined with the XL<sup>15</sup> refinement package using least squares minimization. The non-hydrogen atoms were refined anisotropically. Hydrogen atoms were refined using the riding model.

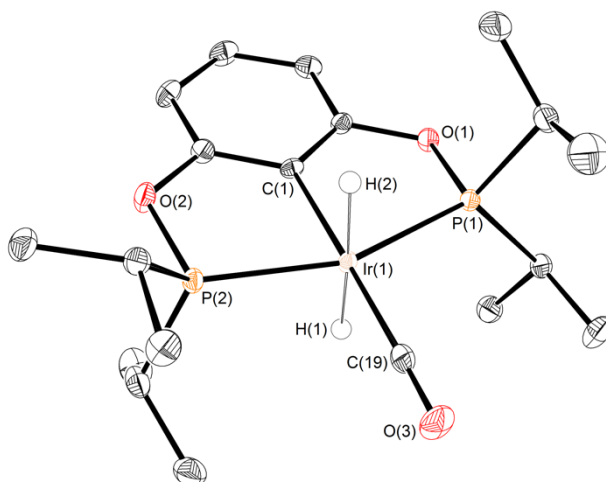

Figure S42. ORTEP<sup>16</sup> of **trans-5** shown with thermal ellipsoids at 50% probability. Hydrogen atoms, except for the Ir-bound hydrides, are omitted for clarity. Selected bond lengths (Å) and angles (°) for *trans*-<sup>(iPr)</sup><sub>4</sub>(POCOP)Ir(CO)(H)<sub>2</sub> (**trans-5**): Ir(1)-C(1) 2.0614(16), Ir(1)-P(1) 2.2894(4), Ir(1)-P(2) 2.2815(4), Ir(1)-C(19) 1.8945(18), C(19)-O(3) 1.145(2); C(19)-Ir(1)-C(1) 178.80(7), C(1)-Ir(1)-P(1) 78.52(5), C(1)-Ir(1)-P(2) 78.66(5), P(1)-Ir(1)-P(2) 157.14(2).

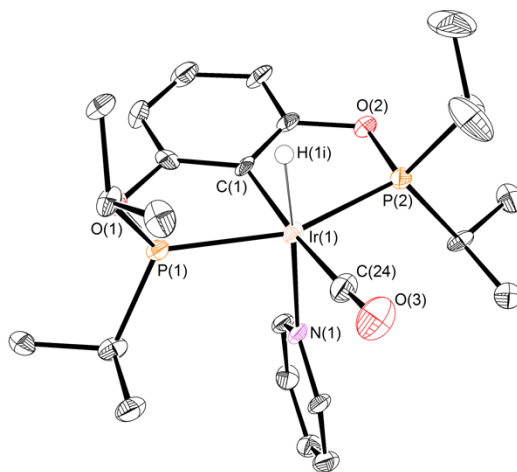

Figure S43. ORTEP<sup>16</sup> of **7-BF<sub>4</sub>** shown with thermal ellipsoids at 50% probability. BF<sub>4</sub> anion and hydrogen atoms, except for the Ir-bound hydride, are omitted for clarity. Selected bond lengths (Å) and angles (°) for [<sup>(iPr)</sup><sub>4</sub>(POCOP)Ir(CO)(H)(pyr)]BF<sub>4</sub> (**7-BF<sub>4</sub>**): Ir(1)-C(1) 2.040(8), Ir(1)-P(1) 2.319(2), Ir(1)-P(2) 2.320(2), Ir(1)-N(1) 2.236(6), Ir(1)-C(24) 1.927(8), C(24)-O(3) 1.142(9); C(24)-Ir(1)-N(1) 95.2(3), C(1)-Ir(1)-N(1) 93.3(3), N(1)-Ir(1)-P(1) 93.4(2), N(1)-Ir(1)-P(2) 92.6(2).

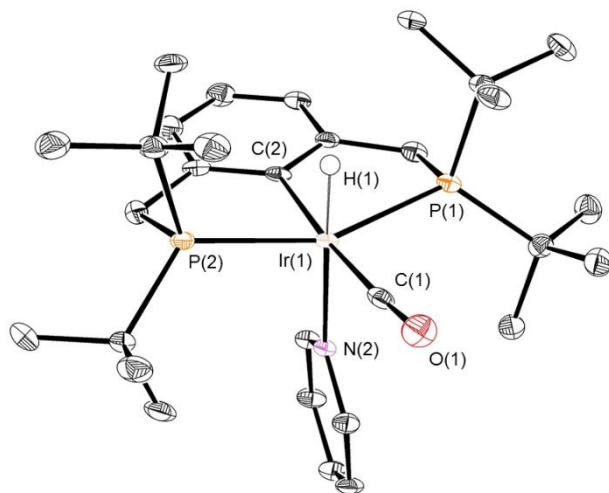

Figure S44. ORTEP<sup>16</sup> of **12** shown with thermal ellipsoids at 50% probability. BF<sub>4</sub> anion, solvent of crystallization (CH<sub>2</sub>Cl<sub>2</sub>) and hydrogen atoms, except for the Ir-bound hydride, are omitted for clarity. There were two molecules in the asymmetric unit, only fragment one is shown. Selected bond lengths (Å) and angles (°) for [<sup>(tBu)</sup>4(PCP)Ir(CO)(H)(pyr)]BF<sub>4</sub> (**12**): Ir(1)-C(2) 2.103(4), Ir(1)-P(1) 2.363(1), Ir(1)-P(2) 2.365(1), Ir(1)-N(2) 2.234(3), Ir(1)-C(1) 1.918(4), C(1)-O(2) 1.138(5), P(1)-Ir(1)-P(2) 156.12(4), P(1)-Ir(1)-N(2) 97.57(8), P(2)-Ir(1)-N(2) 99.12(8), C(2)-Ir(1)-N(2) 88.7(1), C(1)-Ir(1)-N(2) 95.4(2).

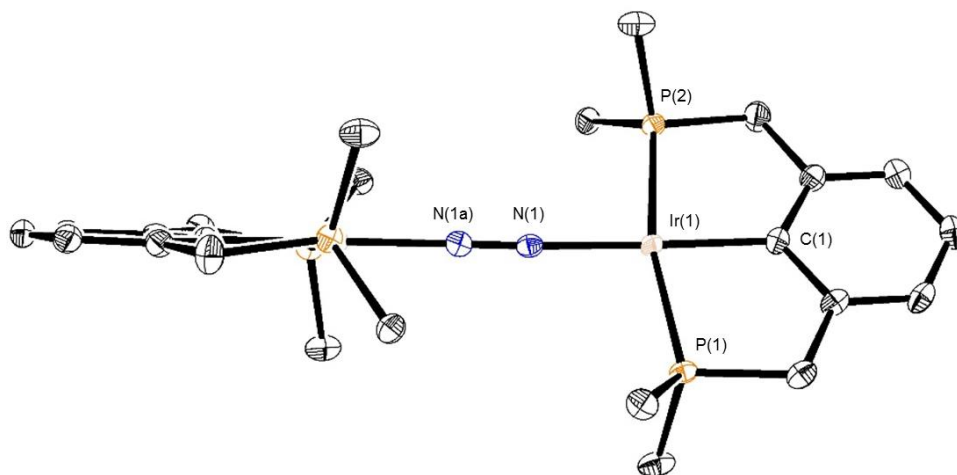

Figure S45. ORTEP<sup>16</sup> of [<sup>(iPr)</sup>4(PCP)Ir]<sub>2</sub>(μ-N<sub>2</sub>) shown with thermal ellipsoids at 50% probability. <sup>i</sup>Pr groups are truncated and hydrogen atoms are omitted for clarity. A crystallographic mirror plane bisects the N-N bond. Selected bond lengths (Å) and angles (°) for [<sup>(iPr)</sup>4(PCP)Ir]<sub>2</sub>(μ-N<sub>2</sub>): Ir(1)-C(1) 2.041(3), Ir(1)-P(1) 2.2687(7), Ir(1)-P(2) 2.2684(7), Ir(1)-N(1) 1.950(2), N(1)-N(1a) 1.125(3), P(1)-Ir(1)-P(2) 166.15(3), C(1)-Ir(1)-N(1) 177.93(10).

Table S1. Crystallographic data for complexes *trans*-**5**, **7-BF<sub>4</sub>**, **12**, and [(iPr)<sup>4</sup>(PCP)Ir]<sub>2</sub>(μ-N<sub>2</sub>).

|                                                   | <i>trans</i> - <b>5</b>                                         | <b>7-BF<sub>4</sub></b>                                                          | <b>12</b>                                                                                                                                   | [(iPr) <sup>4</sup> (PCP)Ir] <sub>2</sub> (μ-N <sub>2</sub> )                 |
|---------------------------------------------------|-----------------------------------------------------------------|----------------------------------------------------------------------------------|---------------------------------------------------------------------------------------------------------------------------------------------|-------------------------------------------------------------------------------|
| Empirical formula                                 | C <sub>19</sub> H <sub>33</sub> IrO <sub>3</sub> P <sub>2</sub> | C <sub>24</sub> H <sub>37</sub> BF <sub>4</sub> IrNO <sub>3</sub> P <sub>2</sub> | C <sub>62</sub> H <sub>102</sub> B <sub>2</sub> Cl <sub>4</sub> F <sub>8</sub> Ir <sub>2</sub> N <sub>2</sub> O <sub>2</sub> P <sub>4</sub> | C <sub>40</sub> H <sub>70</sub> Ir <sub>2</sub> N <sub>2</sub> P <sub>4</sub> |
| Formula weight                                    | 563.59                                                          | 728.49                                                                           | 1731.15                                                                                                                                     | 1087.26                                                                       |
| Temperature (K)                                   | 100(2)                                                          | 100(2)                                                                           | 100(2)                                                                                                                                      | 100(2)                                                                        |
| Wavelength (Å)                                    | 0.71073                                                         | 0.71073                                                                          | 0.71073                                                                                                                                     | 0.71073                                                                       |
| Crystal system                                    | Triclinic                                                       | Triclinic                                                                        | Triclinic                                                                                                                                   | Monoclinic                                                                    |
| Space group                                       | P -1                                                            | P -1                                                                             | P -1                                                                                                                                        | C2/c                                                                          |
| Unit cell axes (Å)                                | a = 7.8388(5)<br>b = 9.9117(7)<br>c = 15.1225(10)               | a = 10.7054(9)<br>b = 14.1797(10)<br>c = 18.4651(16)                             | a = 12.9175(9)<br>b = 14.7329(10)<br>c = 20.1421(14)                                                                                        | a = 21.4680(15)<br>b = 10.9382(6)<br>c = 20.3858(14)                          |
| Unit cell angles (°)                              | α = 105.935(3)<br>β = 92.176(3)<br>γ = 107.411(3)               | α = 89.544(4)<br>β = 88.624(4)<br>γ = 88.014(3)                                  | α = 109.001(4)<br>β = 96.628(4)<br>γ = 90.772(4)                                                                                            | α = 90<br>β = 111.938(5)<br>γ = 90                                            |
| Volume (Å <sup>3</sup> )                          | 1068.76(12)                                                     | 2800.4(4)                                                                        | 3594.9(4)                                                                                                                                   | 4440.4(5)                                                                     |
| Z                                                 | 2                                                               | 4                                                                                | 2                                                                                                                                           | 4                                                                             |
| Density (calculated) (Mg/m <sup>3</sup> )         | 1.751                                                           | 1.728                                                                            | 1.599                                                                                                                                       | 1.626                                                                         |
| Absorption coefficient (mm <sup>-1</sup> )        | 6.411                                                           | 4.935                                                                            | 3.998                                                                                                                                       | 6.160                                                                         |
| F(000)                                            | 556                                                             | 1440                                                                             | 1736.0                                                                                                                                      | 2152.0                                                                        |
| Crystal size (mm <sup>3</sup> )                   | 0.18 × 0.15 × 0.10                                              | 0.16 × 0.13 × 0.020                                                              | 0.4 × 0.3 × 0.03                                                                                                                            | 0.04 × 0.03 × 0.01                                                            |
| Theta range for data collection                   | 2.26 to 28.42°                                                  | 1.437 to 28.342°                                                                 | 2.928 to 56.87°                                                                                                                             | 4.09 to 56.808°                                                               |
| Index Ranges                                      | -10 ≤ h ≤ 10<br>-13 ≤ k ≤ 13<br>-20 ≤ l ≤ 20                    | -14 ≤ h ≤ 14<br>-18 ≤ k ≤ 18<br>0 ≤ l ≤ 24                                       | -17 ≤ h ≤ 17<br>-19 ≤ k ≤ 19<br>-26 ≤ l ≤ 26                                                                                                | -28 ≤ h ≤ 28<br>-14 ≤ k ≤ 14<br>-27 ≤ l ≤ 27                                  |
| Reflections collected                             | 46232                                                           | 70125                                                                            | 156408                                                                                                                                      | 97720                                                                         |
| Independent reflections                           | 5353                                                            | 13356                                                                            | 17805                                                                                                                                       | 5567                                                                          |
| R <sub>int</sub>                                  | 0.0274                                                          | 0.0778                                                                           | 0.0693                                                                                                                                      | 0.0531                                                                        |
| Data / restraints / parameters                    | 5353 / 0 / 242                                                  | 13356 / 25 / 672                                                                 | 17805 / 1 / 807                                                                                                                             | 5567 / 0 / 225                                                                |
| Goodness-of-fit on F <sup>2</sup>                 | 1.045                                                           | 1.016                                                                            | 1.032                                                                                                                                       | 1.039                                                                         |
| Final R indices [I > 2σ(I)]                       | R <sub>1</sub> = 0.0132, wR <sub>2</sub> = 0.0268               | R <sub>1</sub> = 0.0494, wR <sub>2</sub> = 0.1201                                | R <sub>1</sub> = 0.0344, wR <sub>2</sub> = 0.0726                                                                                           | R <sub>1</sub> = 0.0190, wR <sub>2</sub> = 0.0374                             |
| R indices (all data)                              | R <sub>1</sub> = 0.0143, wR <sub>2</sub> = 0.0271               | R <sub>1</sub> = 0.0756, wR <sub>2</sub> = 0.1358                                | R <sub>1</sub> = 0.0545, wR <sub>2</sub> = 0.0820                                                                                           | R <sub>1</sub> = 0.0286, wR <sub>2</sub> = 0.0405                             |
| Largest diff. peak and hole (e. Å <sup>-3</sup> ) | 0.558 and -0.560                                                | 3.090 and -2.688                                                                 | 2.33 and -2.14                                                                                                                              | 1.28 and -0.79                                                                |

## References

- 
- <sup>1</sup> Göttker-Schnetmann, I.; White, P. S.; Brookhart, M. *Organometallics* **2004**, *23*, 1766–1776.
- <sup>2</sup> Goldberg, J. M.; Wong, G. W.; Brastow, K. E.; Kaminsky, W.; Goldberg, K. I.; Heinekey, D. M. *Organometallics* **2015**, *34*, 753–762.
- <sup>3</sup> Grönberg, K. L. C.; Henderson, R. A.; Oglieve, K. E. *J. Chem. Soc., Dalton Trans.* **1998**, 3093–3104.
- <sup>4</sup> Rybtchinski, B.; Ben-David, Y.; Milstein, D. *Organometallics* **1997**, *16*, 3786–3793.
- <sup>5</sup> Drago, R. S., *Physical Methods for Chemists*. 2nd ed.; Surfside Scientific Publishers: Gainesville, FL, 1992.
- <sup>6</sup> Kaljurand, I.; Kütt, A.; Sooväli, L.; Rodima, T.; Mäemets, V.; Leito, I.; Koppel, I. A. *J. Org. Chem.* **2005**, *70*, 1019–1028.
- <sup>7</sup> (a) Jia, G.; Lau, C.-P. *Coord. Chem. Rev.* **1999**, *190-192*, 83–108. (b) Li, T.; Lough, A. J.; Morris, R. H. *Chem. Eur. J.* **2007**, *13*, 3796–3803.
- <sup>8</sup> Saouma, C. T.; Kaminsky, W.; Mayer, J. M. *J. Am. Chem. Soc.* **2012**, *134*, 7293–7296.
- <sup>9</sup> Adapted from: Cherry, S. D. T. Ph. D. Dissertation, University of Washington, Seattle, WA, 2016.
- <sup>10</sup> Bruker APEX2 (Version 2.1-4), SAINT (version 7.34A), SADABS (version 2007/4), BrukerAXS Inc, Madison, Wisconsin, USA, 2007.
- <sup>11</sup> (a) Altomare, A.; Burla, C.; Camalli, M.; Cascarano, G. L.; Giacovazzo, C.; Guagliardi, A.; Moliterni, A. G. G.; Polidori, G.; Spagna, R. SIR97: a new tool for crystal structure determination and refinement *J. Appl. Cryst.* **1999**, *32*, 115–119. (b) Altomare, A.; Cascarano, G. L.; Giacovazzo, C.; Guagliardi, A. Completion and refinement of crystal structures with SIR 92. *J. Appl. Cryst.* **1993**, *26*, 343–350.
- <sup>12</sup> (a) Sheldrick, G. M. SHELXL-97, Program for the Refinement of Crystal Structures. University of Göttingen, Germany, 1997. (b) Mackay, S.; Edwards, C.; Henderson, A.; Gilmore, C.; Stewart, N.; Shankland, K.; Donald, A. *MaXus: a computer program for the solution and refinement of crystal structures from diffraction data*. University of Glasgow, Scotland, 1997.
- <sup>13</sup> Waasmaier, D.; Kirfel, A. New Analytical Scattering Factor Functions for Free Atoms and Ions. *Acta Crystallogr., Sect. A* **1995**, *51*, 416–430.
- <sup>14</sup> Dolomanov, O. V.; Bourhis, L. J.; Gildea, R. J.; Howard, J. A. K.; Puschmann, H. "OLEX2: a complete structure solution, refinement and analysis program." *J. Appl. Cryst.* **2009**, *42*, 339–341.
- <sup>15</sup> Sheldrick, G. M. *Acta Crystallogr. Sect. A* **2008**, *64*, 112–122.
- <sup>16</sup> (a) Farrugia, L. J. *J. Appl. Cryst.* **2012**, *45*, 849–854. (b) Farrugia, L. J. *J. Appl. Cryst.* **1997**, *30*, 565.
